# Supplementary material for: Should the Contribution of One Additional Lame Cow Depend on How Many Other Cows on the Farm Are Lame?
Source: Animals (Basel). 2017 Dec 11;7(12):96. doi: 10.3390/ani7120096 (PMC5742790; doi:10.3390/ani7120096)
Supplement: Supplementary file 1 [file animals-07-00096-s001.zip]

Archive with 4 entries (4 files):
- Kopi af supplementary - Copy of Farm data (N44).xlsx
- Data for Sociological study 2.csv
- Data sociolgical study 1.csv
- Questionnaire Final - Animal Welfare Experts.pdf
