# Supplementary material for: Should the Contribution of One Additional Lame Cow Depend on How Many Other Cows on the Farm Are Lame?
Source: Animals (Basel). 2017 Dec 11;7(12):96. doi: 10.3390/ani7120096 (PMC5742790; doi:10.3390/ani7120096)
Supplement: Supplementary file 1 [file animals-07-00096-s001.zip › Data for Sociological study 2.csv]

RespondentID,"AccessBrush","AccessOthers","AvoidanceDistance","BeddingMaterial","CubicleSize","DairyLameness","Diarrhea","GettingUp","LyingOutside","SCC"
Respondent_10,"Score_7","Score_10","Score_9","Score_7","Score_6","Score_10","Score_10","Score_10","Score_10","Score_7"
Respondent_100,"Score_6","Score_6","Score_8","Score_6","Score_7","Score_10","Score_10","Score_8","Score_5","Score_8"
Respondent_101,"Score_7","Score_5","Score_6","Score_9","Score_8","Score_8","Score_7","Score_9","Score_8","Score_5"
Respondent_103,"Score_6","Score_6","Score_7","Score_7","Score_7","Score_9","Score_7","Score_8","Score_7","Score_7"
Respondent_105,"Score_5","Score_7","Score_7","Score_6","Score_4","Score_9","Score_8","Score_8","Score_7","Score_4"
Respondent_106,"Score_5","Score_8","Score_6","Score_8","Score_9","Score_8","Score_7","Score_9","Score_8","Score_7"
Respondent_107,"Score_10","Score_5","Score_6","Score_10","Score_9","Score_10","Score_8","Score_7","Score_7","Score_8"
Respondent_108,"Score_7","Score_10","Score_8","Score_8","Score_8","Score_9","Score_9","Score_8","Score_9","Score_8"
Respondent_11,"Score_2","Score_2","Score_2","Score_8","Score_5","Score_10","Score_3","Score_3","Score_6","Score_3"
Respondent_110,"Score_7","Score_10","Score_7","Score_9","Score_7","Score_9","Score_7","Score_9","Score_8","Score_4"
Respondent_111,"Score_7","Score_5","Score_8","Score_8","Score_8","Score_10","Score_5","Score_8","Score_8","Score_6"
Respondent_112,"Score_4","Score_3","Score_3","Score_4","Score_7","Score_8","Score_3","Score_3","Score_5","Score_6"
Respondent_113,"Score_7","Score_10","Score_5","Score_5","Score_8","Score_0","Score_4","Score_1","Score_1","Score_6"
Respondent_114,"Score_6","Score_7","Score_5","Score_7","Score_7","Score_8","Score_8","Score_5","Score_8","Score_5"
Respondent_115,"Score_3","Score_9","Score_5","Score_8","Score_8","Score_9","Score_2","Score_8","Score_9","Score_7"
Respondent_116,"Score_4","Score_7","Score_4","Score_9","Score_8","Score_10","Score_2","Score_8","Score_3","Score_6"
Respondent_117,"Score_7","Score_8","Score_7","Score_9","Score_7","Score_9","Score_8","Score_9","Score_9","Score_6"
Respondent_118,"Score_9","Score_7","Score_7","Score_9","Score_9","Score_9","Score_8","Score_8","Score_2","Score_7"
Respondent_119,"Score_7","Score_10","Score_8","Score_8","Score_8","Score_10","Score_9","Score_9","Score_10","Score_7"
Respondent_12,"Score_5","Score_7","Score_6","Score_6","Score_8","Score_10","Score_8","Score_9","Score_8","Score_6"
Respondent_121,"Score_6","Score_9","Score_7","Score_1","Score_2","Score_10","Score_10","Score_9","Score_10","Score_2"
Respondent_123,"Score_3","Score_9","Score_5","Score_8","Score_9","Score_8","Score_2","Score_8","Score_7","Score_3"
Respondent_125,"Score_1","Score_5","Score_1","Score_5","Score_7","Score_8","Score_2","Score_5","Score_8","Score_5"
Respondent_127,"Score_8","Score_6","Score_6","Score_8","Score_8","Score_9","Score_8","Score_7","Score_6","Score_8"
Respondent_129,"Score_7","Score_8","Score_6","Score_8","Score_8","Score_10","Score_8","Score_8","Score_7","Score_8"
Respondent_13,"Score_7","Score_8","Score_3","Score_6","Score_7","Score_10","Score_9","Score_8","Score_3","Score_8"
Respondent_130,"Score_6","Score_8","Score_9","Score_9","Score_9","Score_10","Score_10","Score_10","Score_0","Score_5"
Respondent_132,"Score_7","Score_5","Score_5","Score_3","Score_4","Score_1","Score_4","Score_4","Score_5","Score_7"
Respondent_133,"Score_7","Score_6","Score_6","Score_8","Score_8","Score_10","Score_9","Score_10","Score_6","Score_9"
Respondent_134,"Score_7","Score_7","Score_8","Score_7","Score_7","Score_8","Score_8","Score_8","Score_8","Score_5"
Respondent_135,"Score_8","Score_10","Score_5","Score_9","Score_10","Score_7","Score_10","Score_9","Score_7","Score_8"
Respondent_136,"Score_3","Score_8","Score_9","Score_4","Score_5","Score_10","Score_4","Score_9","Score_1","Score_6"
Respondent_138,"Score_6","Score_4","Score_5","Score_3","Score_6","Score_6","Score_3","Score_6","Score_7","Score_7"
Respondent_139,"Score_6","Score_7","Score_7","Score_6","Score_5","Score_9","Score_7","Score_6","Score_4","Score_6"
Respondent_14,"Score_6","Score_8","Score_9","Score_9","Score_8","Score_10","Score_7","Score_10","Score_10","Score_3"
Respondent_140,"Score_5","Score_5","Score_6","Score_7","Score_8","Score_10","Score_8","Score_8","Score_8","Score_9"
Respondent_141,"Score_7","Score_5","Score_6","Score_6","Score_8","Score_9","Score_7","Score_8","Score_8","Score_6"
Respondent_142,"Score_7","Score_7","Score_7","Score_9","Score_8","Score_9","Score_9","Score_7","Score_7","Score_8"
Respondent_143,"Score_7","Score_9","Score_7","Score_10","Score_8","Score_9","Score_10","Score_9","Score_8","Score_3"
Respondent_145,"Score_5","Score_5","Score_7","Score_6","Score_5","Score_10","Score_9","Score_8","Score_8","Score_5"
Respondent_146,"Score_2","Score_5","Score_2","Score_4","Score_6","Score_10","Score_6","Score_7","Score_6","Score_1"
Respondent_147,"Score_9","Score_8","Score_5","Score_8","Score_9","Score_9","Score_9","Score_10","Score_9","Score_2"
Respondent_148,"Score_7","Score_10","Score_6","Score_9","Score_6","Score_9","Score_9","Score_9","Score_7","Score_7"
Respondent_149,"Score_8","Score_5","Score_5","Score_8","Score_6","Score_4","Score_3","Score_5","Score_4","Score_6"
Respondent_15,"Score_8","Score_7","Score_8","Score_8","Score_10","Score_10","Score_10","Score_10","Score_4","Score_10"
Respondent_151,"Score_5","Score_6","Score_10","Score_8","Score_9","Score_10","Score_10","Score_8","Score_7","Score_7"
Respondent_152,"Score_4","Score_5","Score_9","Score_5","Score_4","Score_10","Score_9","Score_7","Score_8","Score_8"
Respondent_153,"Score_10","Score_7","Score_6","Score_7","Score_7","Score_10","Score_8","Score_9","Score_7","Score_6"
Respondent_154,"Score_5","Score_10","Score_8","Score_7","Score_5","Score_10","Score_10","Score_10","Score_10","Score_5"
Respondent_155,"Score_8","Score_10","Score_2","Score_10","Score_10","Score_0","Score_0","Score_10","Score_0","Score_3"
Respondent_157,"Score_3","Score_5","Score_8","Score_3","Score_4","Score_9","Score_7","Score_6","Score_6","Score_8"
Respondent_158,"Score_6","Score_10","Score_3","Score_9","Score_10","Score_10","Score_8","Score_10","Score_10","Score_8"
Respondent_159,"Score_8","Score_8","Score_9","Score_10","Score_9","Score_10","Score_8","Score_9","Score_9","Score_4"
Respondent_160,"Score_4","Score_5","Score_6","Score_4","Score_5","Score_8","Score_8","Score_8","Score_7","Score_4"
Respondent_161,"Score_6","Score_8","Score_8","Score_9","Score_8","Score_8","Score_8","Score_9","Score_7","Score_5"
Respondent_162,"Score_9","Score_10","Score_2","Score_10","Score_10","Score_2","Score_2","Score_10","Score_3","Score_2"
Respondent_163,"Score_7","Score_5","Score_7","Score_7","Score_8","Score_7","Score_8","Score_7","Score_6","Score_8"
Respondent_164,"Score_4","Score_5","Score_6","Score_7","Score_7","Score_9","Score_8","Score_7","Score_6","Score_8"
Respondent_165,"Score_7","Score_6","Score_6","Score_7","Score_7","Score_10","Score_9","Score_8","Score_8","Score_5"
Respondent_166,"Score_4","Score_3","Score_3","Score_4","Score_6","Score_8","Score_7","Score_7","Score_7","Score_5"
Respondent_167,"Score_6","Score_7","Score_7","Score_6","Score_9","Score_10","Score_10","Score_6","Score_6","Score_9"
Respondent_168,"Score_5","Score_7","Score_8","Score_10","Score_10","Score_10","Score_8","Score_8","Score_7","Score_4"
Respondent_169,"Score_6","Score_8","Score_8","Score_8","Score_8","Score_10","Score_7","Score_8","Score_7","Score_8"
Respondent_17,"Score_8","Score_6","Score_4","Score_5","Score_7","Score_8","Score_5","Score_8","Score_4","Score_6"
Respondent_170,"Score_4","Score_2","Score_3","Score_7","Score_6","Score_10","Score_10","Score_7","Score_7","Score_7"
Respondent_171,"Score_5","Score_9","Score_8","Score_6","Score_8","Score_9","Score_8","Score_7","Score_6","Score_7"
Respondent_172,"Score_3","Score_6","Score_8","Score_1","Score_2","Score_8","Score_1","Score_8","Score_10","Score_1"
Respondent_173,"Score_4","Score_8","Score_7","Score_5","Score_5","Score_9","Score_8","Score_8","Score_7","Score_5"
Respondent_175,"Score_8","Score_6","Score_8","Score_9","Score_8","Score_10","Score_7","Score_10","Score_10","Score_6"
Respondent_177,"Score_6","Score_8","Score_8","Score_8","Score_9","Score_8","Score_8","Score_8","Score_7","Score_6"
Respondent_178,"Score_4","Score_10","Score_4","Score_7","Score_9","Score_10","Score_8","Score_9","Score_10","Score_8"
Respondent_179,"Score_8","Score_10","Score_4","Score_2","Score_3","Score_10","Score_8","Score_7","Score_6","Score_3"
Respondent_18,"Score_6","Score_10","Score_7","Score_10","Score_8","Score_10","Score_8","Score_9","Score_2","Score_5"
Respondent_180,"Score_8","Score_8","Score_5","Score_5","Score_5","Score_8","Score_7","Score_8","Score_5","Score_8"
Respondent_181,"Score_7","Score_7","Score_5","Score_6","Score_7","Score_7","Score_5","Score_6","Score_5","Score_6"
Respondent_182,"Score_3","Score_5","Score_2","Score_2","Score_4","Score_3","Score_3","Score_2","Score_3","Score_5"
Respondent_183,"Score_7","Score_7","Score_7","Score_6","Score_6","Score_8","Score_7","Score_8","Score_8","Score_5"
Respondent_184,"Score_6","Score_8","Score_6","Score_8","Score_7","Score_9","Score_6","Score_7","Score_7","Score_2"
Respondent_185,"Score_6","Score_8","Score_3","Score_7","Score_6","Score_8","Score_7","Score_7","Score_6","Score_4"
Respondent_186,"Score_4","Score_5","Score_2","Score_10","Score_6","Score_10","Score_10","Score_8","Score_10","Score_5"
Respondent_188,"Score_7","Score_1","Score_3","Score_3","Score_3","Score_9","Score_3","Score_2","Score_2","Score_5"
Respondent_189,"Score_0","Score_0","Score_8","Score_0","Score_0","Score_10","Score_10","Score_8","Score_10","Score_8"
Respondent_19,"Score_8","Score_10","Score_5","Score_2","Score_8","Score_10","Score_10","Score_8","Score_8","Score_10"
Respondent_190,"Score_6","Score_6","Score_6","Score_6","Score_8","Score_10","Score_8","Score_8","Score_8","Score_8"
Respondent_191,"Score_2","Score_8","Score_2","Score_7","Score_8","Score_9","Score_6","Score_8","Score_8","Score_0"
Respondent_192,"Score_7","Score_7","Score_8","Score_6","Score_8","Score_10","Score_9","Score_10","Score_7","Score_4"
Respondent_193,"Score_7","Score_10","Score_5","Score_9","Score_9","Score_9","Score_6","Score_8","Score_9","Score_8"
Respondent_194,"Score_8","Score_8","Score_5","Score_8","Score_8","Score_9","Score_8","Score_6","Score_6","Score_6"
Respondent_195,"Score_2","Score_5","Score_6","Score_7","Score_5","Score_9","Score_4","Score_7","Score_6","Score_4"
Respondent_196,"Score_8","Score_6","Score_7","Score_6","Score_7","Score_10","Score_9","Score_9","Score_9","Score_9"
Respondent_2,"Score_8","Score_10","Score_0","Score_10","Score_10","Score_8","Score_8","Score_10","Score_10","Score_0"
Respondent_20,"Score_7","Score_7","Score_7","Score_9","Score_8","Score_10","Score_9","Score_8","Score_8","Score_10"
Respondent_21,"Score_9","Score_8","Score_5","Score_9","Score_9","Score_9","Score_8","Score_10","Score_10","Score_10"
Respondent_22,"Score_9","Score_8","Score_5","Score_3","Score_2","Score_3","Score_3","Score_3","Score_4","Score_3"
Respondent_23,"Score_7","Score_9","Score_8","Score_9","Score_9","Score_10","Score_10","Score_10","Score_0","Score_9"
Respondent_24,"Score_5","Score_8","Score_3","Score_8","Score_8","Score_8","Score_8","Score_8","Score_5","Score_5"
Respondent_25,"Score_6","Score_6","Score_4","Score_7","Score_7","Score_5","Score_0","Score_3","Score_3","Score_4"
Respondent_28,"Score_5","Score_8","Score_3","Score_9","Score_8","Score_9","Score_7","Score_9","Score_8","Score_6"
Respondent_29,"Score_7","Score_8","Score_8","Score_6","Score_8","Score_9","Score_8","Score_7","Score_8","Score_4"
Respondent_3,"Score_7","Score_8","Score_8","Score_8","Score_9","Score_9","Score_9","Score_9","Score_8","Score_9"
Respondent_30,"Score_7","Score_8","Score_8","Score_8","Score_8","Score_10","Score_5","Score_4","Score_2","Score_2"
Respondent_31,"Score_3","Score_7","Score_6","Score_6","Score_6","Score_10","Score_6","Score_8","Score_8","Score_10"
Respondent_32,"Score_4","Score_7","Score_6","Score_8","Score_9","Score_10","Score_5","Score_5","Score_2","Score_7"
Respondent_33,"Score_1","Score_8","Score_5","Score_8","Score_8","Score_7","Score_8","Score_9","Score_9","Score_4"
Respondent_34,"Score_6","Score_5","Score_6","Score_3","Score_3","Score_4","Score_2","Score_4","Score_5","Score_3"
Respondent_35,"Score_8","Score_8","Score_3","Score_9","Score_7","Score_10","Score_9","Score_8","Score_9","Score_5"
Respondent_36,"Score_5","Score_7","Score_4","Score_8","Score_7","Score_8","Score_6","Score_5","Score_4","Score_6"
Respondent_37,"Score_5","Score_6","Score_8","Score_5","Score_5","Score_10","Score_10","Score_2","Score_2","Score_6"
Respondent_38,"Score_9","Score_8","Score_4","Score_7","Score_8","Score_9","Score_10","Score_9","Score_9","Score_8"
Respondent_40,"Score_6","Score_10","Score_5","Score_9","Score_7","Score_10","Score_8","Score_9","Score_5","Score_7"
Respondent_41,"Score_3","Score_9","Score_6","Score_7","Score_7","Score_9","Score_8","Score_7","Score_7","Score_6"
Respondent_42,"Score_5","Score_6","Score_5","Score_9","Score_9","Score_8","Score_4","Score_9","Score_10","Score_6"
Respondent_43,"Score_5","Score_7","Score_3","Score_8","Score_7","Score_9","Score_7","Score_9","Score_8","Score_6"
Respondent_44,"Score_8","Score_7","Score_9","Score_10","Score_9","Score_10","Score_10","Score_5","Score_6","Score_10"
Respondent_45,"Score_5","Score_3","Score_5","Score_1","Score_2","Score_2","Score_3","Score_2","Score_2","Score_1"
Respondent_46,"Score_2","Score_7","Score_6","Score_4","Score_7","Score_8","Score_4","Score_8","Score_6","Score_4"
Respondent_48,"Score_7","Score_8","Score_7","Score_8","Score_9","Score_10","Score_10","Score_10","Score_9","Score_8"
Respondent_5,"Score_8","Score_8","Score_5","Score_8","Score_8","Score_8","Score_7","Score_5","Score_5","Score_4"
Respondent_50,"Score_6","Score_2","Score_5","Score_5","Score_5","Score_8","Score_3","Score_6","Score_4","Score_7"
Respondent_51,"Score_5","Score_7","Score_5","Score_8","Score_7","Score_10","Score_9","Score_7","Score_7","Score_8"
Respondent_52,"Score_2","Score_8","Score_8","Score_10","Score_8","Score_10","Score_3","Score_2","Score_2","Score_3"
Respondent_53,"Score_8","Score_6","Score_6","Score_6","Score_5","Score_8","Score_7","Score_6","Score_3","Score_5"
Respondent_54,"Score_2","Score_9","Score_4","Score_6","Score_6","Score_6","Score_7","Score_8","Score_8","Score_5"
Respondent_55,"Score_3","Score_8","Score_7","Score_8","Score_8","Score_10","Score_8","Score_5","Score_5","Score_2"
Respondent_56,"Score_6","Score_10","Score_6","Score_9","Score_9","Score_10","Score_7","Score_9","Score_7","Score_8"
Respondent_57,"Score_3","Score_4","Score_4","Score_5","Score_5","Score_9","Score_8","Score_5","Score_2","Score_7"
Respondent_58,"Score_7","Score_8","Score_9","Score_9","Score_9","Score_9","Score_8","Score_9","Score_8","Score_6"
Respondent_6,"Score_5","Score_10","Score_3","Score_7","Score_6","Score_10","Score_10","Score_9","Score_6","Score_6"
Respondent_61,"Score_5","Score_10","Score_9","Score_10","Score_10","Score_10","Score_10","Score_10","Score_10","Score_8"
Respondent_62,"Score_8","Score_6","Score_3","Score_10","Score_8","Score_10","Score_8","Score_8","Score_8","Score_6"
Respondent_63,"Score_3","Score_4","Score_7","Score_7","Score_7","Score_10","Score_6","Score_7","Score_8","Score_2"
Respondent_64,"Score_9","Score_5","Score_0","Score_10","Score_9","Score_10","Score_9","Score_8","Score_9","Score_9"
Respondent_67,"Score_7","Score_6","Score_10","Score_7","Score_9","Score_9","Score_7","Score_9","Score_9","Score_6"
Respondent_68,"Score_1","Score_8","Score_9","Score_6","Score_8","Score_10","Score_7","Score_9","Score_7","Score_3"
Respondent_69,"Score_8","Score_7","Score_6","Score_8","Score_8","Score_9","Score_4","Score_4","Score_6","Score_8"
Respondent_70,"Score_3","Score_5","Score_3","Score_8","Score_8","Score_9","Score_3","Score_8","Score_7","Score_4"
Respondent_74,"Score_6","Score_7","Score_5","Score_9","Score_9","Score_10","Score_8","Score_10","Score_8","Score_8"
Respondent_75,"Score_6","Score_9","Score_8","Score_6","Score_7","Score_10","Score_6","Score_9","Score_8","Score_7"
Respondent_76,"Score_7","Score_4","Score_6","Score_10","Score_10","Score_10","Score_7","Score_8","Score_4","Score_6"
Respondent_77,"Score_5","Score_3","Score_4","Score_8","Score_3","Score_2","Score_2","Score_3","Score_4","Score_5"
Respondent_78,"Score_8","Score_8","Score_5","Score_8","Score_8","Score_10","Score_5","Score_8","Score_8","Score_3"
Respondent_8,"Score_6","Score_10","Score_7","Score_8","Score_8","Score_10","Score_8","Score_10","Score_10","Score_8"
Respondent_80,"Score_6","Score_7","Score_7","Score_9","Score_8","Score_10","Score_9","Score_9","Score_8","Score_5"
Respondent_81,"Score_8","Score_8","Score_9","Score_0","Score_0","Score_8","Score_5","Score_10","Score_7","Score_3"
Respondent_82,"Score_6","Score_7","Score_6","Score_6","Score_8","Score_7","Score_4","Score_10","Score_7","Score_4"
Respondent_83,"Score_8","Score_7","Score_5","Score_9","Score_8","Score_10","Score_8","Score_8","Score_7","Score_8"
Respondent_84,"Score_4","Score_5","Score_8","Score_7","Score_6","Score_10","Score_10","Score_9","Score_9","Score_7"
Respondent_86,"Score_8","Score_10","Score_8","Score_10","Score_10","Score_10","Score_8","Score_10","Score_10","Score_5"
Respondent_87,"Score_5","Score_10","Score_5","Score_10","Score_10","Score_10","Score_8","Score_10","Score_10","Score_5"
Respondent_88,"Score_6","Score_2","Score_6","Score_8","Score_8","Score_8","Score_7","Score_7","Score_4","Score_4"
Respondent_89,"Score_7","Score_10","Score_9","Score_10","Score_9","Score_10","Score_5","Score_7","Score_7","Score_10"
Respondent_90,"Score_4","Score_5","Score_4","Score_7","Score_8","Score_7","Score_1","Score_5","Score_7","Score_5"
Respondent_91,"Score_5","Score_7","Score_2","Score_5","Score_8","Score_10","Score_3","Score_10","Score_10","Score_2"
Respondent_92,"Score_7","Score_5","Score_5","Score_3","Score_4","Score_5","Score_5","Score_2","Score_3","Score_1"
Respondent_93,"Score_6","Score_8","Score_7","Score_6","Score_5","Score_9","Score_7","Score_5","Score_7","Score_7"
Respondent_94,"Score_3","Score_5","Score_3","Score_7","Score_6","Score_9","Score_7","Score_10","Score_8","Score_4"
Respondent_95,"Score_5","Score_6","Score_5","Score_4","Score_3","Score_9","Score_4","Score_6","Score_7","Score_3"
Respondent_96,"Score_6","Score_8","Score_8","Score_8","Score_10","Score_10","Score_8","Score_10","Score_8","Score_6"
Respondent_98,"Score_5","Score_2","Score_8","Score_9","Score_8","Score_10","Score_10","Score_7","Score_7","Score_7"
