# Supplementary material for: Should the Contribution of One Additional Lame Cow Depend on How Many Other Cows on the Farm Are Lame?
Source: Animals (Basel). 2017 Dec 11;7(12):96. doi: 10.3390/ani7120096 (PMC5742790; doi:10.3390/ani7120096)
Supplement: Supplementary file 1 [file animals-07-00096-s001.zip › Data sociolgical study 1.csv]

RespondentID,"Species","Condition","Severe","Mild","SeverePrevalence","MildPrevalence","Score","OrdinalScore"
Respondent_10,"Cow","Lameness","Zero","Moderate",0,0.4,4,"Score_4"
Respondent_10,"Cow","Lameness","Zero","High",0,0.7,1,"Score_1"
Respondent_10,"Cow","Lameness","Low","Moderate",0.05,0.4,2,"Score_2"
Respondent_10,"Cow","Lameness","Low","High",0.05,0.7,1,"Score_1"
Respondent_10,"Cow","Lameness","Moderate","Moderate",0.15,0.4,1,"Score_1"
Respondent_100,"Cow","Lameness","Zero","Low",0,0.1,6,"Score_6"
Respondent_100,"Cow","Lameness","Zero","Moderate",0,0.4,3,"Score_3"
Respondent_100,"Cow","Lameness","Moderate","High",0.15,0.7,0,"Score_0"
Respondent_100,"Cow","Lameness","Low","Low",0.05,0.1,4,"Score_4"
Respondent_100,"Cow","Lameness","Moderate","Low",0.15,0.1,2,"Score_2"
Respondent_101,"Cow","Lameness","Zero","Low",0,0.1,4,"Score_4"
Respondent_101,"Cow","Lameness","Zero","High",0,0.7,0,"Score_0"
Respondent_101,"Cow","Lameness","Low","High",0.05,0.7,0,"Score_0"
Respondent_101,"Cow","Lameness","Low","Low",0.05,0.1,4,"Score_4"
Respondent_101,"Cow","Lameness","Moderate","Low",0.15,0.1,0,"Score_0"
Respondent_102,"Cow","Lameness","Zero","Low",0,0.1,5,"Score_5"
Respondent_102,"Cow","Lameness","Zero","High",0,0.7,2,"Score_2"
Respondent_102,"Cow","Lameness","Low","Low",0.05,0.1,2,"Score_2"
Respondent_102,"Cow","Lameness","Low","High",0.05,0.7,0,"Score_0"
Respondent_102,"Cow","Lameness","Moderate","Low",0.15,0.1,0,"Score_0"
Respondent_103,"Cow","Lameness","Moderate","High",0.15,0.7,0,"Score_0"
Respondent_103,"Cow","Lameness","Zero","Low",0,0.1,3,"Score_3"
Respondent_103,"Cow","Lameness","Moderate","Low",0.15,0.1,1,"Score_1"
Respondent_103,"Cow","Lameness","Zero","Moderate",0,0.4,2,"Score_2"
Respondent_103,"Cow","Lameness","Low","Low",0.05,0.1,2,"Score_2"
Respondent_104,"Cow","Lameness","Low","Low",0.05,0.1,2,"Score_2"
Respondent_104,"Cow","Lameness","Low","High",0.05,0.7,0,"Score_0"
Respondent_104,"Cow","Lameness","Zero","Low",0,0.1,4,"Score_4"
Respondent_104,"Cow","Lameness","Moderate","Low",0.15,0.1,0,"Score_0"
Respondent_104,"Cow","Lameness","Moderate","High",0.15,0.7,0,"Score_0"
Respondent_105,"Cow","Lameness","Moderate","Low",0.15,0.1,0,"Score_0"
Respondent_105,"Cow","Lameness","Zero","Low",0,0.1,3,"Score_3"
Respondent_105,"Cow","Lameness","Low","Low",0.05,0.1,1,"Score_1"
Respondent_105,"Cow","Lameness","Moderate","High",0.15,0.7,0,"Score_0"
Respondent_105,"Cow","Lameness","Zero","Moderate",0,0.4,0,"Score_0"
Respondent_106,"Cow","Lameness","Low","High",0.05,0.7,0,"Score_0"
Respondent_106,"Cow","Lameness","Zero","High",0,0.7,0,"Score_0"
Respondent_106,"Cow","Lameness","Moderate","Low",0.15,0.1,0,"Score_0"
Respondent_106,"Cow","Lameness","Zero","Low",0,0.1,3,"Score_3"
Respondent_106,"Cow","Lameness","Low","Low",0.05,0.1,1,"Score_1"
Respondent_107,"Cow","Lameness","Low","Low",0.05,0.1,6,"Score_6"
Respondent_107,"Cow","Lameness","Moderate","High",0.15,0.7,2,"Score_2"
Respondent_107,"Cow","Lameness","Zero","High",0,0.7,5,"Score_5"
Respondent_107,"Cow","Lameness","Low","High",0.05,0.7,3,"Score_3"
Respondent_107,"Cow","Lameness","Moderate","Low",0.15,0.1,3,"Score_3"
Respondent_108,"Cow","Lameness","Zero","Low",0,0.1,3,"Score_3"
Respondent_108,"Cow","Lameness","Zero","High",0,0.7,1,"Score_1"
Respondent_108,"Cow","Lameness","Low","Moderate",0.05,0.4,0,"Score_0"
Respondent_108,"Cow","Lameness","Moderate","Low",0.15,0.1,0,"Score_0"
Respondent_108,"Cow","Lameness","Low","Low",0.05,0.1,1,"Score_1"
Respondent_109,"Cow","Lameness","Moderate","High",0.15,0.7,0,"Score_0"
Respondent_109,"Cow","Lameness","Zero","Low",0,0.1,2,"Score_2"
Respondent_109,"Cow","Lameness","Moderate","Low",0.15,0.1,0,"Score_0"
Respondent_109,"Cow","Lameness","Low","Low",0.05,0.1,1,"Score_1"
Respondent_109,"Cow","Lameness","Zero","Moderate",0,0.4,2,"Score_2"
Respondent_11,"Cow","Lameness","Moderate","Low",0.15,0.1,0,"Score_0"
Respondent_11,"Cow","Lameness","Low","High",0.05,0.7,1,"Score_1"
Respondent_11,"Cow","Lameness","Moderate","High",0.15,0.7,0,"Score_0"
Respondent_11,"Cow","Lameness","Zero","Moderate",0,0.4,1,"Score_1"
Respondent_11,"Cow","Lameness","Low","Low",0.05,0.1,2,"Score_2"
Respondent_110,"Cow","Lameness","Low","Moderate",0.05,0.4,3,"Score_3"
Respondent_110,"Cow","Lameness","Low","Low",0.05,0.1,4,"Score_4"
Respondent_110,"Cow","Lameness","Moderate","High",0.15,0.7,3,"Score_3"
Respondent_110,"Cow","Lameness","Zero","Moderate",0,0.4,5,"Score_5"
Respondent_110,"Cow","Lameness","Low","High",0.05,0.7,3,"Score_3"
Respondent_111,"Cow","Lameness","Zero","Moderate",0,0.4,2,"Score_2"
Respondent_111,"Cow","Lameness","Moderate","Moderate",0.15,0.4,0,"Score_0"
Respondent_111,"Cow","Lameness","Moderate","High",0.15,0.7,0,"Score_0"
Respondent_111,"Cow","Lameness","Zero","High",0,0.7,0,"Score_0"
Respondent_111,"Cow","Lameness","Low","Moderate",0.05,0.4,0,"Score_0"
Respondent_112,"Cow","Lameness","Zero","High",0,0.7,3,"Score_3"
Respondent_112,"Cow","Lameness","Zero","Low",0,0.1,5,"Score_5"
Respondent_112,"Cow","Lameness","Low","High",0.05,0.7,2,"Score_2"
Respondent_112,"Cow","Lameness","Moderate","Low",0.15,0.1,5,"Score_5"
Respondent_112,"Cow","Lameness","Low","Moderate",0.05,0.4,3,"Score_3"
Respondent_113,"Cow","Lameness","Moderate","High",0.15,0.7,0,"Score_0"
Respondent_113,"Cow","Lameness","Moderate","Moderate",0.15,0.4,0,"Score_0"
Respondent_113,"Cow","Lameness","Zero","Moderate",0,0.4,0,"Score_0"
Respondent_113,"Cow","Lameness","Moderate","Low",0.15,0.1,0,"Score_0"
Respondent_113,"Cow","Lameness","Low","Low",0.05,0.1,0,"Score_0"
Respondent_114,"Cow","Lameness","Moderate","Low",0.15,0.1,2,"Score_2"
Respondent_114,"Cow","Lameness","Low","Low",0.05,0.1,3,"Score_3"
Respondent_114,"Cow","Lameness","Low","High",0.05,0.7,0,"Score_0"
Respondent_114,"Cow","Lameness","Zero","Moderate",0,0.4,2,"Score_2"
Respondent_114,"Cow","Lameness","Moderate","High",0.15,0.7,0,"Score_0"
Respondent_115,"Cow","Lameness","Moderate","Moderate",0.15,0.4,1,"Score_1"
Respondent_115,"Cow","Lameness","Zero","Moderate",0,0.4,6,"Score_6"
Respondent_115,"Cow","Lameness","Low","Low",0.05,0.1,2,"Score_2"
Respondent_115,"Cow","Lameness","Moderate","High",0.15,0.7,1,"Score_1"
Respondent_115,"Cow","Lameness","Moderate","Low",0.15,0.1,1,"Score_1"
Respondent_116,"Cow","Lameness","Zero","High",0,0.7,0,"Score_0"
Respondent_116,"Cow","Lameness","Low","Moderate",0.05,0.4,1,"Score_1"
Respondent_116,"Cow","Lameness","Low","High",0.05,0.7,0,"Score_0"
Respondent_116,"Cow","Lameness","Zero","Low",0,0.1,3,"Score_3"
Respondent_116,"Cow","Lameness","Moderate","Moderate",0.15,0.4,0,"Score_0"
Respondent_117,"Cow","Lameness","Zero","Low",0,0.1,6,"Score_6"
Respondent_117,"Cow","Lameness","Low","Low",0.05,0.1,5,"Score_5"
Respondent_117,"Cow","Lameness","Moderate","Low",0.15,0.1,0,"Score_0"
Respondent_117,"Cow","Lameness","Moderate","High",0.15,0.7,0,"Score_0"
Respondent_117,"Cow","Lameness","Zero","Moderate",0,0.4,3,"Score_3"
Respondent_118,"Cow","Lameness","Zero","High",0,0.7,3,"Score_3"
Respondent_118,"Cow","Lameness","Low","High",0.05,0.7,2,"Score_2"
Respondent_118,"Cow","Lameness","Low","Moderate",0.05,0.4,2,"Score_2"
Respondent_118,"Cow","Lameness","Moderate","Low",0.15,0.1,2,"Score_2"
Respondent_118,"Cow","Lameness","Zero","Low",0,0.1,4,"Score_4"
Respondent_119,"Cow","Lameness","Moderate","High",0.15,0.7,0,"Score_0"
Respondent_119,"Cow","Lameness","Low","Low",0.05,0.1,2,"Score_2"
Respondent_119,"Cow","Lameness","Zero","Moderate",0,0.4,4,"Score_4"
Respondent_119,"Cow","Lameness","Moderate","Moderate",0.15,0.4,0,"Score_0"
Respondent_119,"Cow","Lameness","Low","Moderate",0.05,0.4,1,"Score_1"
Respondent_12,"Cow","Lameness","Low","High",0.05,0.7,2,"Score_2"
Respondent_12,"Cow","Lameness","Moderate","Low",0.15,0.1,1,"Score_1"
Respondent_12,"Cow","Lameness","Zero","High",0,0.7,3,"Score_3"
Respondent_12,"Cow","Lameness","Low","Low",0.05,0.1,2,"Score_2"
Respondent_12,"Cow","Lameness","Zero","Low",0,0.1,7,"Score_7"
Respondent_120,"Cow","Lameness","Zero","Low",0,0.1,2,"Score_2"
Respondent_120,"Cow","Lameness","Low","Low",0.05,0.1,1,"Score_1"
Respondent_120,"Cow","Lameness","Low","High",0.05,0.7,0,"Score_0"
Respondent_120,"Cow","Lameness","Moderate","High",0.15,0.7,0,"Score_0"
Respondent_120,"Cow","Lameness","Moderate","Low",0.15,0.1,1,"Score_1"
Respondent_121,"Cow","Lameness","Moderate","Moderate",0.15,0.4,0,"Score_0"
Respondent_121,"Cow","Lameness","Low","Low",0.05,0.1,1,"Score_1"
Respondent_121,"Cow","Lameness","Moderate","High",0.15,0.7,0,"Score_0"
Respondent_121,"Cow","Lameness","Low","Moderate",0.05,0.4,1,"Score_1"
Respondent_121,"Cow","Lameness","Zero","Moderate",0,0.4,1,"Score_1"
Respondent_122,"Cow","Lameness","Zero","Low",0,0.1,5,"Score_5"
Respondent_122,"Cow","Lameness","Zero","High",0,0.7,3,"Score_3"
Respondent_122,"Cow","Lameness","Moderate","Low",0.15,0.1,2,"Score_2"
Respondent_122,"Cow","Lameness","Low","Moderate",0.05,0.4,4,"Score_4"
Respondent_122,"Cow","Lameness","Low","High",0.05,0.7,3,"Score_3"
Respondent_123,"Cow","Lameness","Zero","Low",0,0.1,5,"Score_5"
Respondent_123,"Cow","Lameness","Low","Moderate",0.05,0.4,0,"Score_0"
Respondent_123,"Cow","Lameness","Low","High",0.05,0.7,0,"Score_0"
Respondent_123,"Cow","Lameness","Moderate","Moderate",0.15,0.4,0,"Score_0"
Respondent_123,"Cow","Lameness","Zero","High",0,0.7,0,"Score_0"
Respondent_124,"Cow","Lameness","Zero","Moderate",0,0.4,3,"Score_3"
Respondent_124,"Cow","Lameness","Moderate","Moderate",0.15,0.4,1,"Score_1"
Respondent_124,"Cow","Lameness","Moderate","Low",0.15,0.1,3,"Score_3"
Respondent_124,"Cow","Lameness","Moderate","High",0.15,0.7,0,"Score_0"
Respondent_124,"Cow","Lameness","Low","Low",0.05,0.1,6,"Score_6"
Respondent_125,"Cow","Lameness","Moderate","Low",0.15,0.1,3,"Score_3"
Respondent_125,"Cow","Lameness","Low","High",0.05,0.7,1,"Score_1"
Respondent_125,"Cow","Lameness","Low","Low",0.05,0.1,6,"Score_6"
Respondent_125,"Cow","Lameness","Zero","Low",0,0.1,7,"Score_7"
Respondent_125,"Cow","Lameness","Zero","High",0,0.7,1,"Score_1"
Respondent_126,"Cow","Lameness","Low","High",0.05,0.7,1,"Score_1"
Respondent_126,"Cow","Lameness","Zero","Low",0,0.1,6,"Score_6"
Respondent_126,"Cow","Lameness","Moderate","Low",0.15,0.1,1,"Score_1"
Respondent_126,"Cow","Lameness","Moderate","Moderate",0.15,0.4,0,"Score_0"
Respondent_126,"Cow","Lameness","Zero","High",0,0.7,2,"Score_2"
Respondent_127,"Cow","Lameness","Zero","Moderate",0,0.4,1,"Score_1"
Respondent_127,"Cow","Lameness","Low","High",0.05,0.7,2,"Score_2"
Respondent_127,"Cow","Lameness","Moderate","Low",0.15,0.1,1,"Score_1"
Respondent_127,"Cow","Lameness","Zero","Low",0,0.1,4,"Score_4"
Respondent_127,"Cow","Lameness","Moderate","High",0.15,0.7,0,"Score_0"
Respondent_128,"Cow","Lameness","Low","Moderate",0.05,0.4,2,"Score_2"
Respondent_128,"Cow","Lameness","Zero","Low",0,0.1,6,"Score_6"
Respondent_128,"Cow","Lameness","Moderate","Moderate",0.15,0.4,0,"Score_0"
Respondent_128,"Cow","Lameness","Zero","High",0,0.7,3,"Score_3"
Respondent_128,"Cow","Lameness","Low","High",0.05,0.7,0,"Score_0"
Respondent_129,"Cow","Lameness","Zero","Low",0,0.1,7,"Score_7"
Respondent_129,"Cow","Lameness","Moderate","Low",0.15,0.1,1,"Score_1"
Respondent_129,"Cow","Lameness","Zero","High",0,0.7,5,"Score_5"
Respondent_129,"Cow","Lameness","Low","Moderate",0.05,0.4,5,"Score_5"
Respondent_129,"Cow","Lameness","Low","High",0.05,0.7,4,"Score_4"
Respondent_13,"Cow","Lameness","Zero","Moderate",0,0.4,3,"Score_3"
Respondent_13,"Cow","Lameness","Moderate","High",0.15,0.7,0,"Score_0"
Respondent_13,"Cow","Lameness","Moderate","Moderate",0.15,0.4,0,"Score_0"
Respondent_13,"Cow","Lameness","Low","Low",0.05,0.1,2,"Score_2"
Respondent_13,"Cow","Lameness","Low","Moderate",0.05,0.4,1,"Score_1"
Respondent_130,"Cow","Lameness","Moderate","High",0.15,0.7,0,"Score_0"
Respondent_130,"Cow","Lameness","Zero","Moderate",0,0.4,0,"Score_0"
Respondent_130,"Cow","Lameness","Moderate","Low",0.15,0.1,0,"Score_0"
Respondent_130,"Cow","Lameness","Zero","Low",0,0.1,1,"Score_1"
Respondent_130,"Cow","Lameness","Low","Low",0.05,0.1,1,"Score_1"
Respondent_131,"Cow","Lameness","Zero","High",0,0.7,2,"Score_2"
Respondent_131,"Cow","Lameness","Zero","Moderate",0,0.4,4,"Score_4"
Respondent_131,"Cow","Lameness","Low","Moderate",0.05,0.4,4,"Score_4"
Respondent_131,"Cow","Lameness","Moderate","Moderate",0.15,0.4,1,"Score_1"
Respondent_131,"Cow","Lameness","Moderate","High",0.15,0.7,0,"Score_0"
Respondent_132,"Cow","Lameness","Moderate","Low",0.15,0.1,2,"Score_2"
Respondent_132,"Cow","Lameness","Moderate","Moderate",0.15,0.4,1,"Score_1"
Respondent_132,"Cow","Lameness","Moderate","High",0.15,0.7,1,"Score_1"
Respondent_132,"Cow","Lameness","Low","Low",0.05,0.1,2,"Score_2"
Respondent_132,"Cow","Lameness","Zero","Moderate",0,0.4,4,"Score_4"
Respondent_133,"Cow","Lameness","Low","Low",0.05,0.1,4,"Score_4"
Respondent_133,"Cow","Lameness","Moderate","Moderate",0.15,0.4,0,"Score_0"
Respondent_133,"Cow","Lameness","Low","Moderate",0.05,0.4,2,"Score_2"
Respondent_133,"Cow","Lameness","Zero","Moderate",0,0.4,4,"Score_4"
Respondent_133,"Cow","Lameness","Moderate","High",0.15,0.7,0,"Score_0"
Respondent_134,"Cow","Lameness","Moderate","Low",0.15,0.1,1,"Score_1"
Respondent_134,"Cow","Lameness","Low","Low",0.05,0.1,3,"Score_3"
Respondent_134,"Cow","Lameness","Low","High",0.05,0.7,2,"Score_2"
Respondent_134,"Cow","Lameness","Moderate","High",0.15,0.7,0,"Score_0"
Respondent_134,"Cow","Lameness","Zero","Low",0,0.1,4,"Score_4"
Respondent_135,"Cow","Lameness","Low","Low",0.05,0.1,3,"Score_3"
Respondent_135,"Cow","Lameness","Low","High",0.05,0.7,0,"Score_0"
Respondent_135,"Cow","Lameness","Moderate","Low",0.15,0.1,1,"Score_1"
Respondent_135,"Cow","Lameness","Zero","Moderate",0,0.4,2,"Score_2"
Respondent_135,"Cow","Lameness","Zero","Low",0,0.1,4,"Score_4"
Respondent_136,"Cow","Lameness","Moderate","Low",0.15,0.1,2,"Score_2"
Respondent_136,"Cow","Lameness","Moderate","High",0.15,0.7,1,"Score_1"
Respondent_136,"Cow","Lameness","Low","Moderate",0.05,0.4,2,"Score_2"
Respondent_136,"Cow","Lameness","Low","Low",0.05,0.1,3,"Score_3"
Respondent_136,"Cow","Lameness","Zero","High",0,0.7,2,"Score_2"
Respondent_137,"Cow","Lameness","Moderate","Low",0.15,0.1,0,"Score_0"
Respondent_137,"Cow","Lameness","Zero","Low",0,0.1,2,"Score_2"
Respondent_137,"Cow","Lameness","Moderate","High",0.15,0.7,0,"Score_0"
Respondent_137,"Cow","Lameness","Low","Low",0.05,0.1,0,"Score_0"
Respondent_137,"Cow","Lameness","Zero","Moderate",0,0.4,0,"Score_0"
Respondent_138,"Cow","Lameness","Moderate","High",0.15,0.7,0,"Score_0"
Respondent_138,"Cow","Lameness","Zero","Low",0,0.1,5,"Score_5"
Respondent_138,"Cow","Lameness","Low","Low",0.05,0.1,3,"Score_3"
Respondent_138,"Cow","Lameness","Moderate","Low",0.15,0.1,1,"Score_1"
Respondent_138,"Cow","Lameness","Low","High",0.05,0.7,1,"Score_1"
Respondent_139,"Cow","Lameness","Moderate","High",0.15,0.7,0,"Score_0"
Respondent_139,"Cow","Lameness","Low","Moderate",0.05,0.4,0,"Score_0"
Respondent_139,"Cow","Lameness","Moderate","Moderate",0.15,0.4,0,"Score_0"
Respondent_139,"Cow","Lameness","Zero","Moderate",0,0.4,2,"Score_2"
Respondent_139,"Cow","Lameness","Low","Low",0.05,0.1,0,"Score_0"
Respondent_14,"Cow","Lameness","Zero","High",0,0.7,0,"Score_0"
Respondent_14,"Cow","Lameness","Moderate","Moderate",0.15,0.4,0,"Score_0"
Respondent_14,"Cow","Lameness","Low","Moderate",0.05,0.4,0,"Score_0"
Respondent_14,"Cow","Lameness","Zero","Low",0,0.1,1,"Score_1"
Respondent_14,"Cow","Lameness","Low","High",0.05,0.7,0,"Score_0"
Respondent_140,"Cow","Lameness","Low","Moderate",0.05,0.4,0,"Score_0"
Respondent_140,"Cow","Lameness","Moderate","Moderate",0.15,0.4,0,"Score_0"
Respondent_140,"Cow","Lameness","Zero","Low",0,0.1,1,"Score_1"
Respondent_140,"Cow","Lameness","Zero","High",0,0.7,0,"Score_0"
Respondent_140,"Cow","Lameness","Low","High",0.05,0.7,0,"Score_0"
Respondent_141,"Cow","Lameness","Low","High",0.05,0.7,4,"Score_4"
Respondent_141,"Cow","Lameness","Zero","High",0,0.7,5,"Score_5"
Respondent_141,"Cow","Lameness","Low","Moderate",0.05,0.4,5,"Score_5"
Respondent_141,"Cow","Lameness","Zero","Low",0,0.1,8,"Score_8"
Respondent_141,"Cow","Lameness","Moderate","Low",0.15,0.1,3,"Score_3"
Respondent_142,"Cow","Lameness","Low","High",0.05,0.7,2,"Score_2"
Respondent_142,"Cow","Lameness","Zero","Low",0,0.1,5,"Score_5"
Respondent_142,"Cow","Lameness","Zero","High",0,0.7,2,"Score_2"
Respondent_142,"Cow","Lameness","Low","Moderate",0.05,0.4,2,"Score_2"
Respondent_142,"Cow","Lameness","Moderate","Moderate",0.15,0.4,2,"Score_2"
Respondent_143,"Cow","Lameness","Zero","High",0,0.7,2,"Score_2"
Respondent_143,"Cow","Lameness","Moderate","High",0.15,0.7,1,"Score_1"
Respondent_143,"Cow","Lameness","Low","Low",0.05,0.1,2,"Score_2"
Respondent_143,"Cow","Lameness","Moderate","Low",0.15,0.1,3,"Score_3"
Respondent_143,"Cow","Lameness","Low","High",0.05,0.7,1,"Score_1"
Respondent_144,"Cow","Lameness","Moderate","Low",0.15,0.1,1,"Score_1"
Respondent_144,"Cow","Lameness","Moderate","Moderate",0.15,0.4,0,"Score_0"
Respondent_144,"Cow","Lameness","Low","Low",0.05,0.1,1,"Score_1"
Respondent_144,"Cow","Lameness","Zero","Moderate",0,0.4,4,"Score_4"
Respondent_144,"Cow","Lameness","Moderate","High",0.15,0.7,0,"Score_0"
Respondent_145,"Cow","Lameness","Zero","Low",0,0.1,6,"Score_6"
Respondent_145,"Cow","Lameness","Low","Moderate",0.05,0.4,5,"Score_5"
Respondent_145,"Cow","Lameness","Low","High",0.05,0.7,3,"Score_3"
Respondent_145,"Cow","Lameness","Moderate","Moderate",0.15,0.4,1,"Score_1"
Respondent_145,"Cow","Lameness","Zero","High",0,0.7,1,"Score_1"
Respondent_146,"Cow","Lameness","Zero","Low",0,0.1,10,"Score_10"
Respondent_146,"Cow","Lameness","Low","Low",0.05,0.1,7,"Score_7"
Respondent_146,"Cow","Lameness","Moderate","Low",0.15,0.1,3,"Score_3"
Respondent_146,"Cow","Lameness","Moderate","High",0.15,0.7,0,"Score_0"
Respondent_146,"Cow","Lameness","Low","High",0.05,0.7,0,"Score_0"
Respondent_147,"Cow","Lameness","Zero","High",0,0.7,0,"Score_0"
Respondent_147,"Cow","Lameness","Low","Low",0.05,0.1,2,"Score_2"
Respondent_147,"Cow","Lameness","Low","High",0.05,0.7,0,"Score_0"
Respondent_147,"Cow","Lameness","Moderate","Low",0.15,0.1,0,"Score_0"
Respondent_147,"Cow","Lameness","Low","Moderate",0.05,0.4,2,"Score_2"
Respondent_148,"Cow","Lameness","Moderate","Low",0.15,0.1,0,"Score_0"
Respondent_148,"Cow","Lameness","Zero","Low",0,0.1,5,"Score_5"
Respondent_148,"Cow","Lameness","Low","High",0.05,0.7,0,"Score_0"
Respondent_148,"Cow","Lameness","Low","Moderate",0.05,0.4,1,"Score_1"
Respondent_148,"Cow","Lameness","Zero","High",0,0.7,0,"Score_0"
Respondent_149,"Cow","Lameness","Zero","Low",0,0.1,4,"Score_4"
Respondent_149,"Cow","Lameness","Zero","Moderate",0,0.4,4,"Score_4"
Respondent_149,"Cow","Lameness","Low","High",0.05,0.7,2,"Score_2"
Respondent_149,"Cow","Lameness","Low","Low",0.05,0.1,3,"Score_3"
Respondent_149,"Cow","Lameness","Moderate","Low",0.15,0.1,2,"Score_2"
Respondent_15,"Cow","Lameness","Moderate","Moderate",0.15,0.4,0,"Score_0"
Respondent_15,"Cow","Lameness","Low","Moderate",0.05,0.4,0,"Score_0"
Respondent_15,"Cow","Lameness","Low","High",0.05,0.7,0,"Score_0"
Respondent_15,"Cow","Lameness","Zero","Low",0,0.1,2,"Score_2"
Respondent_15,"Cow","Lameness","Zero","High",0,0.7,0,"Score_0"
Respondent_151,"Cow","Lameness","Moderate","Low",0.15,0.1,0,"Score_0"
Respondent_151,"Cow","Lameness","Low","High",0.05,0.7,0,"Score_0"
Respondent_151,"Cow","Lameness","Zero","Low",0,0.1,4,"Score_4"
Respondent_151,"Cow","Lameness","Low","Low",0.05,0.1,1,"Score_1"
Respondent_151,"Cow","Lameness","Moderate","High",0.15,0.7,0,"Score_0"
Respondent_152,"Cow","Lameness","Zero","High",0,0.7,1,"Score_1"
Respondent_152,"Cow","Lameness","Zero","Moderate",0,0.4,2,"Score_2"
Respondent_152,"Cow","Lameness","Low","High",0.05,0.7,0,"Score_0"
Respondent_152,"Cow","Lameness","Moderate","Moderate",0.15,0.4,0,"Score_0"
Respondent_152,"Cow","Lameness","Low","Moderate",0.05,0.4,1,"Score_1"
Respondent_153,"Cow","Lameness","Low","Low",0.05,0.1,0,"Score_0"
Respondent_153,"Cow","Lameness","Zero","Moderate",0,0.4,0,"Score_0"
Respondent_153,"Cow","Lameness","Moderate","High",0.15,0.7,0,"Score_0"
Respondent_153,"Cow","Lameness","Moderate","Moderate",0.15,0.4,0,"Score_0"
Respondent_153,"Cow","Lameness","Moderate","Low",0.15,0.1,0,"Score_0"
Respondent_154,"Cow","Lameness","Moderate","Moderate",0.15,0.4,0,"Score_0"
Respondent_154,"Cow","Lameness","Zero","Moderate",0,0.4,2,"Score_2"
Respondent_154,"Cow","Lameness","Low","Moderate",0.05,0.4,1,"Score_1"
Respondent_154,"Cow","Lameness","Moderate","High",0.15,0.7,0,"Score_0"
Respondent_154,"Cow","Lameness","Zero","Low",0,0.1,3,"Score_3"
Respondent_155,"Cow","Lameness","Low","High",0.05,0.7,0,"Score_0"
Respondent_155,"Cow","Lameness","Low","Moderate",0.05,0.4,0,"Score_0"
Respondent_155,"Cow","Lameness","Zero","High",0,0.7,0,"Score_0"
Respondent_155,"Cow","Lameness","Zero","Low",0,0.1,1,"Score_1"
Respondent_155,"Cow","Lameness","Moderate","Moderate",0.15,0.4,0,"Score_0"
Respondent_157,"Cow","Lameness","Zero","Low",0,0.1,7,"Score_7"
Respondent_157,"Cow","Lameness","Moderate","High",0.15,0.7,0,"Score_0"
Respondent_157,"Cow","Lameness","Low","Low",0.05,0.1,4,"Score_4"
Respondent_157,"Cow","Lameness","Zero","Moderate",0,0.4,6,"Score_6"
Respondent_157,"Cow","Lameness","Moderate","Low",0.15,0.1,2,"Score_2"
Respondent_158,"Cow","Lameness","Zero","Low",0,0.1,2,"Score_2"
Respondent_158,"Cow","Lameness","Moderate","Moderate",0.15,0.4,0,"Score_0"
Respondent_158,"Cow","Lameness","Low","High",0.05,0.7,0,"Score_0"
Respondent_158,"Cow","Lameness","Zero","High",0,0.7,1,"Score_1"
Respondent_158,"Cow","Lameness","Low","Moderate",0.05,0.4,0,"Score_0"
Respondent_159,"Cow","Lameness","Low","Low",0.05,0.1,1,"Score_1"
Respondent_159,"Cow","Lameness","Low","Moderate",0.05,0.4,2,"Score_2"
Respondent_159,"Cow","Lameness","Moderate","High",0.15,0.7,0,"Score_0"
Respondent_159,"Cow","Lameness","Zero","Moderate",0,0.4,2,"Score_2"
Respondent_159,"Cow","Lameness","Moderate","Moderate",0.15,0.4,0,"Score_0"
Respondent_16,"Cow","Lameness","Low","Moderate",0.05,0.4,1,"Score_1"
Respondent_16,"Cow","Lameness","Low","High",0.05,0.7,0,"Score_0"
Respondent_16,"Cow","Lameness","Zero","Moderate",0,0.4,3,"Score_3"
Respondent_16,"Cow","Lameness","Zero","High",0,0.7,1,"Score_1"
Respondent_16,"Cow","Lameness","Moderate","Moderate",0.15,0.4,0,"Score_0"
Respondent_160,"Cow","Lameness","Zero","Low",0,0.1,4,"Score_4"
Respondent_160,"Cow","Lameness","Low","Low",0.05,0.1,2,"Score_2"
Respondent_160,"Cow","Lameness","Moderate","Low",0.15,0.1,1,"Score_1"
Respondent_160,"Cow","Lameness","Low","High",0.05,0.7,1,"Score_1"
Respondent_160,"Cow","Lameness","Zero","High",0,0.7,2,"Score_2"
Respondent_161,"Cow","Lameness","Zero","Moderate",0,0.4,2,"Score_2"
Respondent_161,"Cow","Lameness","Moderate","Low",0.15,0.1,2,"Score_2"
Respondent_161,"Cow","Lameness","Low","Low",0.05,0.1,5,"Score_5"
Respondent_161,"Cow","Lameness","Zero","Low",0,0.1,8,"Score_8"
Respondent_161,"Cow","Lameness","Moderate","High",0.15,0.7,0,"Score_0"
Respondent_162,"Cow","Lameness","Low","Low",0.05,0.1,3,"Score_3"
Respondent_162,"Cow","Lameness","Moderate","High",0.15,0.7,0,"Score_0"
Respondent_162,"Cow","Lameness","Moderate","Low",0.15,0.1,1,"Score_1"
Respondent_162,"Cow","Lameness","Zero","High",0,0.7,0,"Score_0"
Respondent_162,"Cow","Lameness","Low","Moderate",0.05,0.4,2,"Score_2"
Respondent_163,"Cow","Lameness","Moderate","Moderate",0.15,0.4,2,"Score_2"
Respondent_163,"Cow","Lameness","Low","High",0.05,0.7,3,"Score_3"
Respondent_163,"Cow","Lameness","Zero","High",0,0.7,3,"Score_3"
Respondent_163,"Cow","Lameness","Low","Moderate",0.05,0.4,2,"Score_2"
Respondent_163,"Cow","Lameness","Zero","Low",0,0.1,3,"Score_3"
Respondent_164,"Cow","Lameness","Low","High",0.05,0.7,2,"Score_2"
Respondent_164,"Cow","Lameness","Moderate","Moderate",0.15,0.4,1,"Score_1"
Respondent_164,"Cow","Lameness","Zero","Low",0,0.1,6,"Score_6"
Respondent_164,"Cow","Lameness","Zero","High",0,0.7,3,"Score_3"
Respondent_164,"Cow","Lameness","Low","Moderate",0.05,0.4,4,"Score_4"
Respondent_165,"Cow","Lameness","Moderate","Moderate",0.15,0.4,0,"Score_0"
Respondent_165,"Cow","Lameness","Moderate","Low",0.15,0.1,0,"Score_0"
Respondent_165,"Cow","Lameness","Low","Low",0.05,0.1,1,"Score_1"
Respondent_165,"Cow","Lameness","Zero","Moderate",0,0.4,1,"Score_1"
Respondent_165,"Cow","Lameness","Moderate","High",0.15,0.7,0,"Score_0"
Respondent_166,"Cow","Lameness","Low","Moderate",0.05,0.4,5,"Score_5"
Respondent_166,"Cow","Lameness","Zero","High",0,0.7,4,"Score_4"
Respondent_166,"Cow","Lameness","Zero","Moderate",0,0.4,7,"Score_7"
Respondent_166,"Cow","Lameness","Moderate","Moderate",0.15,0.4,3,"Score_3"
Respondent_166,"Cow","Lameness","Moderate","High",0.15,0.7,2,"Score_2"
Respondent_167,"Cow","Lameness","Moderate","High",0.15,0.7,0,"Score_0"
Respondent_167,"Cow","Lameness","Low","Moderate",0.05,0.4,1,"Score_1"
Respondent_167,"Cow","Lameness","Zero","Moderate",0,0.4,2,"Score_2"
Respondent_167,"Cow","Lameness","Low","Low",0.05,0.1,1,"Score_1"
Respondent_167,"Cow","Lameness","Moderate","Moderate",0.15,0.4,0,"Score_0"
Respondent_168,"Cow","Lameness","Low","High",0.05,0.7,0,"Score_0"
Respondent_168,"Cow","Lameness","Moderate","Moderate",0.15,0.4,0,"Score_0"
Respondent_168,"Cow","Lameness","Zero","High",0,0.7,0,"Score_0"
Respondent_168,"Cow","Lameness","Low","Moderate",0.05,0.4,0,"Score_0"
Respondent_168,"Cow","Lameness","Zero","Low",0,0.1,3,"Score_3"
Respondent_169,"Cow","Lameness","Low","High",0.05,0.7,1,"Score_1"
Respondent_169,"Cow","Lameness","Moderate","Low",0.15,0.1,1,"Score_1"
Respondent_169,"Cow","Lameness","Moderate","High",0.15,0.7,0,"Score_0"
Respondent_169,"Cow","Lameness","Low","Low",0.05,0.1,3,"Score_3"
Respondent_169,"Cow","Lameness","Zero","High",0,0.7,2,"Score_2"
Respondent_17,"Cow","Lameness","Zero","Low",0,0.1,9,"Score_9"
Respondent_17,"Cow","Lameness","Moderate","Low",0.15,0.1,2,"Score_2"
Respondent_17,"Cow","Lameness","Zero","High",0,0.7,4,"Score_4"
Respondent_17,"Cow","Lameness","Moderate","High",0.15,0.7,0,"Score_0"
Respondent_17,"Cow","Lameness","Low","Low",0.05,0.1,5,"Score_5"
Respondent_170,"Cow","Lameness","Moderate","Moderate",0.15,0.4,0,"Score_0"
Respondent_170,"Cow","Lameness","Zero","Moderate",0,0.4,6,"Score_6"
Respondent_170,"Cow","Lameness","Zero","High",0,0.7,4,"Score_4"
Respondent_170,"Cow","Lameness","Low","Moderate",0.05,0.4,2,"Score_2"
Respondent_170,"Cow","Lameness","Moderate","High",0.15,0.7,1,"Score_1"
Respondent_171,"Cow","Lameness","Low","Moderate",0.05,0.4,3,"Score_3"
Respondent_171,"Cow","Lameness","Zero","High",0,0.7,2,"Score_2"
Respondent_171,"Cow","Lameness","Zero","Moderate",0,0.4,3,"Score_3"
Respondent_171,"Cow","Lameness","Moderate","Moderate",0.15,0.4,2,"Score_2"
Respondent_171,"Cow","Lameness","Moderate","High",0.15,0.7,1,"Score_1"
Respondent_172,"Cow","Lameness","Zero","High",0,0.7,0,"Score_0"
Respondent_172,"Cow","Lameness","Moderate","Moderate",0.15,0.4,0,"Score_0"
Respondent_172,"Cow","Lameness","Low","High",0.05,0.7,0,"Score_0"
Respondent_172,"Cow","Lameness","Zero","Moderate",0,0.4,1,"Score_1"
Respondent_172,"Cow","Lameness","Low","Moderate",0.05,0.4,0,"Score_0"
Respondent_173,"Cow","Lameness","Moderate","Moderate",0.15,0.4,0,"Score_0"
Respondent_173,"Cow","Lameness","Moderate","High",0.15,0.7,0,"Score_0"
Respondent_173,"Cow","Lameness","Low","Low",0.05,0.1,2,"Score_2"
Respondent_173,"Cow","Lameness","Low","Moderate",0.05,0.4,1,"Score_1"
Respondent_173,"Cow","Lameness","Zero","Moderate",0,0.4,2,"Score_2"
Respondent_174,"Cow","Lameness","Moderate","High",0.15,0.7,0,"Score_0"
Respondent_174,"Cow","Lameness","Moderate","Low",0.15,0.1,2,"Score_2"
Respondent_174,"Cow","Lameness","Low","Low",0.05,0.1,4,"Score_4"
Respondent_174,"Cow","Lameness","Zero","Moderate",0,0.4,4,"Score_4"
Respondent_174,"Cow","Lameness","Moderate","Moderate",0.15,0.4,1,"Score_1"
Respondent_175,"Cow","Lameness","Moderate","High",0.15,0.7,0,"Score_0"
Respondent_175,"Cow","Lameness","Zero","High",0,0.7,0,"Score_0"
Respondent_175,"Cow","Lameness","Zero","Moderate",0,0.4,0,"Score_0"
Respondent_175,"Cow","Lameness","Low","Moderate",0.05,0.4,0,"Score_0"
Respondent_175,"Cow","Lameness","Moderate","Moderate",0.15,0.4,0,"Score_0"
Respondent_176,"Cow","Lameness","Moderate","Low",0.15,0.1,2,"Score_2"
Respondent_176,"Cow","Lameness","Zero","Moderate",0,0.4,3,"Score_3"
Respondent_176,"Cow","Lameness","Low","Low",0.05,0.1,3,"Score_3"
Respondent_176,"Cow","Lameness","Moderate","High",0.15,0.7,0,"Score_0"
Respondent_176,"Cow","Lameness","Moderate","Moderate",0.15,0.4,1,"Score_1"
Respondent_177,"Cow","Lameness","Zero","High",0,0.7,2,"Score_2"
Respondent_177,"Cow","Lameness","Moderate","Moderate",0.15,0.4,0,"Score_0"
Respondent_177,"Cow","Lameness","Low","Moderate",0.05,0.4,2,"Score_2"
Respondent_177,"Cow","Lameness","Low","High",0.05,0.7,1,"Score_1"
Respondent_177,"Cow","Lameness","Zero","Low",0,0.1,5,"Score_5"
Respondent_178,"Cow","Lameness","Zero","Moderate",0,0.4,2,"Score_2"
Respondent_178,"Cow","Lameness","Moderate","High",0.15,0.7,0,"Score_0"
Respondent_178,"Cow","Lameness","Low","Moderate",0.05,0.4,1,"Score_1"
Respondent_178,"Cow","Lameness","Moderate","Moderate",0.15,0.4,0,"Score_0"
Respondent_178,"Cow","Lameness","Low","Low",0.05,0.1,2,"Score_2"
Respondent_179,"Cow","Lameness","Moderate","Low",0.15,0.1,0,"Score_0"
Respondent_179,"Cow","Lameness","Moderate","High",0.15,0.7,0,"Score_0"
Respondent_179,"Cow","Lameness","Zero","Moderate",0,0.4,0,"Score_0"
Respondent_179,"Cow","Lameness","Zero","Low",0,0.1,2,"Score_2"
Respondent_179,"Cow","Lameness","Low","Low",0.05,0.1,0,"Score_0"
Respondent_18,"Cow","Lameness","Moderate","Low",0.15,0.1,0,"Score_0"
Respondent_18,"Cow","Lameness","Low","Low",0.05,0.1,0,"Score_0"
Respondent_18,"Cow","Lameness","Low","High",0.05,0.7,0,"Score_0"
Respondent_18,"Cow","Lameness","Moderate","High",0.15,0.7,0,"Score_0"
Respondent_18,"Cow","Lameness","Zero","High",0,0.7,0,"Score_0"
Respondent_180,"Cow","Lameness","Moderate","High",0.15,0.7,0,"Score_0"
Respondent_180,"Cow","Lameness","Zero","Moderate",0,0.4,6,"Score_6"
Respondent_180,"Cow","Lameness","Zero","Low",0,0.1,8,"Score_8"
Respondent_180,"Cow","Lameness","Low","Low",0.05,0.1,4,"Score_4"
Respondent_180,"Cow","Lameness","Moderate","Low",0.15,0.1,2,"Score_2"
Respondent_181,"Cow","Lameness","Low","High",0.05,0.7,2,"Score_2"
Respondent_181,"Cow","Lameness","Zero","Low",0,0.1,4,"Score_4"
Respondent_181,"Cow","Lameness","Low","Moderate",0.05,0.4,3,"Score_3"
Respondent_181,"Cow","Lameness","Moderate","Moderate",0.15,0.4,1,"Score_1"
Respondent_181,"Cow","Lameness","Zero","High",0,0.7,3,"Score_3"
Respondent_182,"Cow","Lameness","Moderate","Moderate",0.15,0.4,2,"Score_2"
Respondent_182,"Cow","Lameness","Zero","Moderate",0,0.4,4,"Score_4"
Respondent_182,"Cow","Lameness","Zero","High",0,0.7,2,"Score_2"
Respondent_182,"Cow","Lameness","Low","High",0.05,0.7,2,"Score_2"
Respondent_182,"Cow","Lameness","Low","Moderate",0.05,0.4,2,"Score_2"
Respondent_183,"Cow","Lameness","Low","Moderate",0.05,0.4,1,"Score_1"
Respondent_183,"Cow","Lameness","Low","High",0.05,0.7,0,"Score_0"
Respondent_183,"Cow","Lameness","Zero","Moderate",0,0.4,2,"Score_2"
Respondent_183,"Cow","Lameness","Moderate","Moderate",0.15,0.4,1,"Score_1"
Respondent_183,"Cow","Lameness","Zero","High",0,0.7,2,"Score_2"
Respondent_184,"Cow","Lameness","Low","High",0.05,0.7,1,"Score_1"
Respondent_184,"Cow","Lameness","Low","Moderate",0.05,0.4,2,"Score_2"
Respondent_184,"Cow","Lameness","Zero","High",0,0.7,2,"Score_2"
Respondent_184,"Cow","Lameness","Zero","Low",0,0.1,8,"Score_8"
Respondent_184,"Cow","Lameness","Moderate","Moderate",0.15,0.4,2,"Score_2"
Respondent_185,"Cow","Lameness","Moderate","Low",0.15,0.1,1,"Score_1"
Respondent_185,"Cow","Lameness","Zero","Low",0,0.1,5,"Score_5"
Respondent_185,"Cow","Lameness","Low","Low",0.05,0.1,3,"Score_3"
Respondent_185,"Cow","Lameness","Zero","High",0,0.7,3,"Score_3"
Respondent_185,"Cow","Lameness","Low","High",0.05,0.7,2,"Score_2"
Respondent_186,"Cow","Lameness","Moderate","Moderate",0.15,0.4,0,"Score_0"
Respondent_186,"Cow","Lameness","Low","High",0.05,0.7,1,"Score_1"
Respondent_186,"Cow","Lameness","Zero","High",0,0.7,3,"Score_3"
Respondent_186,"Cow","Lameness","Zero","Moderate",0,0.4,5,"Score_5"
Respondent_186,"Cow","Lameness","Low","Moderate",0.05,0.4,3,"Score_3"
Respondent_188,"Cow","Lameness","Zero","High",0,0.7,0,"Score_0"
Respondent_188,"Cow","Lameness","Moderate","Moderate",0.15,0.4,1,"Score_1"
Respondent_188,"Cow","Lameness","Low","High",0.05,0.7,1,"Score_1"
Respondent_188,"Cow","Lameness","Zero","Low",0,0.1,3,"Score_3"
Respondent_188,"Cow","Lameness","Low","Moderate",0.05,0.4,2,"Score_2"
Respondent_189,"Cow","Lameness","Zero","Low",0,0.1,7,"Score_7"
Respondent_189,"Cow","Lameness","Zero","High",0,0.7,0,"Score_0"
Respondent_189,"Cow","Lameness","Low","Moderate",0.05,0.4,0,"Score_0"
Respondent_189,"Cow","Lameness","Low","High",0.05,0.7,0,"Score_0"
Respondent_189,"Cow","Lameness","Moderate","Moderate",0.15,0.4,0,"Score_0"
Respondent_19,"Cow","Lameness","Zero","Moderate",0,0.4,0,"Score_0"
Respondent_19,"Cow","Lameness","Moderate","High",0.15,0.7,0,"Score_0"
Respondent_19,"Cow","Lameness","Zero","Low",0,0.1,5,"Score_5"
Respondent_19,"Cow","Lameness","Moderate","Low",0.15,0.1,2,"Score_2"
Respondent_19,"Cow","Lameness","Low","Low",0.05,0.1,3,"Score_3"
Respondent_190,"Cow","Lameness","Moderate","Moderate",0.15,0.4,0,"Score_0"
Respondent_190,"Cow","Lameness","Zero","High",0,0.7,2,"Score_2"
Respondent_190,"Cow","Lameness","Low","Moderate",0.05,0.4,2,"Score_2"
Respondent_190,"Cow","Lameness","Zero","Moderate",0,0.4,5,"Score_5"
Respondent_190,"Cow","Lameness","Low","High",0.05,0.7,1,"Score_1"
Respondent_191,"Cow","Lameness","Low","Low",0.05,0.1,2,"Score_2"
Respondent_191,"Cow","Lameness","Zero","Low",0,0.1,3,"Score_3"
Respondent_191,"Cow","Lameness","Zero","Moderate",0,0.4,1,"Score_1"
Respondent_191,"Cow","Lameness","Moderate","Low",0.15,0.1,1,"Score_1"
Respondent_191,"Cow","Lameness","Moderate","High",0.15,0.7,0,"Score_0"
Respondent_192,"Cow","Lameness","Moderate","Moderate",0.15,0.4,0,"Score_0"
Respondent_192,"Cow","Lameness","Zero","High",0,0.7,1,"Score_1"
Respondent_192,"Cow","Lameness","Low","Moderate",0.05,0.4,2,"Score_2"
Respondent_192,"Cow","Lameness","Zero","Low",0,0.1,2,"Score_2"
Respondent_192,"Cow","Lameness","Low","High",0.05,0.7,0,"Score_0"
Respondent_193,"Cow","Lameness","Zero","High",0,0.7,3,"Score_3"
Respondent_193,"Cow","Lameness","Low","High",0.05,0.7,1,"Score_1"
Respondent_193,"Cow","Lameness","Low","Moderate",0.05,0.4,2,"Score_2"
Respondent_193,"Cow","Lameness","Moderate","Moderate",0.15,0.4,0,"Score_0"
Respondent_193,"Cow","Lameness","Zero","Moderate",0,0.4,4,"Score_4"
Respondent_194,"Cow","Lameness","Zero","Low",0,0.1,3,"Score_3"
Respondent_194,"Cow","Lameness","Moderate","High",0.15,0.7,0,"Score_0"
Respondent_194,"Cow","Lameness","Low","High",0.05,0.7,1,"Score_1"
Respondent_194,"Cow","Lameness","Moderate","Low",0.15,0.1,0,"Score_0"
Respondent_194,"Cow","Lameness","Low","Low",0.05,0.1,2,"Score_2"
Respondent_195,"Cow","Lameness","Moderate","High",0.15,0.7,1,"Score_1"
Respondent_195,"Cow","Lameness","Zero","Moderate",0,0.4,6,"Score_6"
Respondent_195,"Cow","Lameness","Low","Moderate",0.05,0.4,4,"Score_4"
Respondent_195,"Cow","Lameness","Low","Low",0.05,0.1,6,"Score_6"
Respondent_195,"Cow","Lameness","Low","High",0.05,0.7,2,"Score_2"
Respondent_196,"Cow","Lameness","Zero","Low",0,0.1,4,"Score_4"
Respondent_196,"Cow","Lameness","Zero","Moderate",0,0.4,1,"Score_1"
Respondent_196,"Cow","Lameness","Moderate","High",0.15,0.7,0,"Score_0"
Respondent_196,"Cow","Lameness","Moderate","Low",0.15,0.1,0,"Score_0"
Respondent_196,"Cow","Lameness","Low","Low",0.05,0.1,0,"Score_0"
Respondent_2,"Cow","Lameness","Low","Low",0.05,0.1,0,"Score_0"
Respondent_2,"Cow","Lameness","Low","High",0.05,0.7,0,"Score_0"
Respondent_2,"Cow","Lameness","Zero","Low",0,0.1,6,"Score_6"
Respondent_2,"Cow","Lameness","Moderate","High",0.15,0.7,0,"Score_0"
Respondent_2,"Cow","Lameness","Moderate","Low",0.15,0.1,0,"Score_0"
Respondent_20,"Cow","Lameness","Zero","High",0,0.7,1,"Score_1"
Respondent_20,"Cow","Lameness","Moderate","Moderate",0.15,0.4,1,"Score_1"
Respondent_20,"Cow","Lameness","Moderate","Low",0.15,0.1,1,"Score_1"
Respondent_20,"Cow","Lameness","Low","High",0.05,0.7,1,"Score_1"
Respondent_20,"Cow","Lameness","Low","Moderate",0.05,0.4,3,"Score_3"
Respondent_21,"Cow","Lameness","Low","Moderate",0.05,0.4,0,"Score_0"
Respondent_21,"Cow","Lameness","Moderate","High",0.15,0.7,0,"Score_0"
Respondent_21,"Cow","Lameness","Moderate","Moderate",0.15,0.4,0,"Score_0"
Respondent_21,"Cow","Lameness","Zero","Moderate",0,0.4,0,"Score_0"
Respondent_21,"Cow","Lameness","Low","Low",0.05,0.1,0,"Score_0"
Respondent_22,"Cow","Lameness","Moderate","Moderate",0.15,0.4,0,"Score_0"
Respondent_22,"Cow","Lameness","Low","High",0.05,0.7,1,"Score_1"
Respondent_22,"Cow","Lameness","Low","Moderate",0.05,0.4,2,"Score_2"
Respondent_22,"Cow","Lameness","Zero","Low",0,0.1,3,"Score_3"
Respondent_22,"Cow","Lameness","Zero","High",0,0.7,2,"Score_2"
Respondent_23,"Cow","Lameness","Zero","High",0,0.7,0,"Score_0"
Respondent_23,"Cow","Lameness","Low","High",0.05,0.7,0,"Score_0"
Respondent_23,"Cow","Lameness","Zero","Low",0,0.1,0,"Score_0"
Respondent_23,"Cow","Lameness","Moderate","Low",0.15,0.1,0,"Score_0"
Respondent_23,"Cow","Lameness","Low","Moderate",0.05,0.4,0,"Score_0"
Respondent_24,"Cow","Lameness","Low","Low",0.05,0.1,2,"Score_2"
Respondent_24,"Cow","Lameness","Moderate","High",0.15,0.7,0,"Score_0"
Respondent_24,"Cow","Lameness","Moderate","Low",0.15,0.1,0,"Score_0"
Respondent_24,"Cow","Lameness","Moderate","Moderate",0.15,0.4,0,"Score_0"
Respondent_24,"Cow","Lameness","Zero","Moderate",0,0.4,3,"Score_3"
Respondent_25,"Cow","Lameness","Moderate","High",0.15,0.7,1,"Score_1"
Respondent_25,"Cow","Lameness","Low","Low",0.05,0.1,5,"Score_5"
Respondent_25,"Cow","Lameness","Moderate","Low",0.15,0.1,2,"Score_2"
Respondent_25,"Cow","Lameness","Zero","Low",0,0.1,6,"Score_6"
Respondent_25,"Cow","Lameness","Zero","Moderate",0,0.4,4,"Score_4"
Respondent_27,"Cow","Lameness","Low","Low",0.05,0.1,0,"Score_0"
Respondent_27,"Cow","Lameness","Moderate","Low",0.15,0.1,0,"Score_0"
Respondent_27,"Cow","Lameness","Zero","Low",0,0.1,3,"Score_3"
Respondent_27,"Cow","Lameness","Zero","High",0,0.7,1,"Score_1"
Respondent_27,"Cow","Lameness","Low","High",0.05,0.7,0,"Score_0"
Respondent_28,"Cow","Lameness","Moderate","High",0.15,0.7,0,"Score_0"
Respondent_28,"Cow","Lameness","Moderate","Moderate",0.15,0.4,2,"Score_2"
Respondent_28,"Cow","Lameness","Zero","Moderate",0,0.4,4,"Score_4"
Respondent_28,"Cow","Lameness","Low","Low",0.05,0.1,8,"Score_8"
Respondent_28,"Cow","Lameness","Moderate","Low",0.15,0.1,5,"Score_5"
Respondent_29,"Cow","Lameness","Moderate","Moderate",0.15,0.4,0,"Score_0"
Respondent_29,"Cow","Lameness","Zero","Moderate",0,0.4,3,"Score_3"
Respondent_29,"Cow","Lameness","Low","High",0.05,0.7,0,"Score_0"
Respondent_29,"Cow","Lameness","Low","Moderate",0.05,0.4,1,"Score_1"
Respondent_29,"Cow","Lameness","Zero","High",0,0.7,0,"Score_0"
Respondent_3,"Cow","Lameness","Moderate","Moderate",0.15,0.4,0,"Score_0"
Respondent_3,"Cow","Lameness","Low","Low",0.05,0.1,7,"Score_7"
Respondent_3,"Cow","Lameness","Low","Moderate",0.05,0.4,1,"Score_1"
Respondent_3,"Cow","Lameness","Moderate","High",0.15,0.7,0,"Score_0"
Respondent_3,"Cow","Lameness","Zero","Moderate",0,0.4,1,"Score_1"
Respondent_30,"Cow","Lameness","Low","Moderate",0.05,0.4,3,"Score_3"
Respondent_30,"Cow","Lameness","Low","High",0.05,0.7,0,"Score_0"
Respondent_30,"Cow","Lameness","Zero","Low",0,0.1,5,"Score_5"
Respondent_30,"Cow","Lameness","Moderate","Moderate",0.15,0.4,0,"Score_0"
Respondent_30,"Cow","Lameness","Zero","High",0,0.7,0,"Score_0"
Respondent_31,"Cow","Lameness","Moderate","Low",0.15,0.1,0,"Score_0"
Respondent_31,"Cow","Lameness","Low","High",0.05,0.7,0,"Score_0"
Respondent_31,"Cow","Lameness","Zero","Low",0,0.1,3,"Score_3"
Respondent_31,"Cow","Lameness","Moderate","High",0.15,0.7,0,"Score_0"
Respondent_31,"Cow","Lameness","Low","Low",0.05,0.1,2,"Score_2"
Respondent_32,"Cow","Lameness","Moderate","Low",0.15,0.1,0,"Score_0"
Respondent_32,"Cow","Lameness","Low","High",0.05,0.7,1,"Score_1"
Respondent_32,"Cow","Lameness","Zero","Low",0,0.1,4,"Score_4"
Respondent_32,"Cow","Lameness","Moderate","High",0.15,0.7,0,"Score_0"
Respondent_32,"Cow","Lameness","Low","Low",0.05,0.1,3,"Score_3"
Respondent_33,"Cow","Lameness","Low","Low",0.05,0.1,1,"Score_1"
Respondent_33,"Cow","Lameness","Moderate","High",0.15,0.7,0,"Score_0"
Respondent_33,"Cow","Lameness","Moderate","Moderate",0.15,0.4,0,"Score_0"
Respondent_33,"Cow","Lameness","Zero","Moderate",0,0.4,3,"Score_3"
Respondent_33,"Cow","Lameness","Moderate","Low",0.15,0.1,0,"Score_0"
Respondent_34,"Cow","Lameness","Moderate","High",0.15,0.7,0,"Score_0"
Respondent_34,"Cow","Lameness","Low","Low",0.05,0.1,3,"Score_3"
Respondent_34,"Cow","Lameness","Zero","Low",0,0.1,4,"Score_4"
Respondent_34,"Cow","Lameness","Moderate","Low",0.15,0.1,1,"Score_1"
Respondent_34,"Cow","Lameness","Zero","Moderate",0,0.4,1,"Score_1"
Respondent_35,"Cow","Lameness","Zero","Low",0,0.1,8,"Score_8"
Respondent_35,"Cow","Lameness","Moderate","High",0.15,0.7,0,"Score_0"
Respondent_35,"Cow","Lameness","Moderate","Low",0.15,0.1,2,"Score_2"
Respondent_35,"Cow","Lameness","Low","Low",0.05,0.1,4,"Score_4"
Respondent_35,"Cow","Lameness","Zero","Moderate",0,0.4,6,"Score_6"
Respondent_36,"Cow","Lameness","Zero","Low",0,0.1,5,"Score_5"
Respondent_36,"Cow","Lameness","Zero","High",0,0.7,2,"Score_2"
Respondent_36,"Cow","Lameness","Low","Moderate",0.05,0.4,3,"Score_3"
Respondent_36,"Cow","Lameness","Low","High",0.05,0.7,1,"Score_1"
Respondent_36,"Cow","Lameness","Moderate","Low",0.15,0.1,1,"Score_1"
Respondent_37,"Cow","Lameness","Moderate","Moderate",0.15,0.4,1,"Score_1"
Respondent_37,"Cow","Lameness","Zero","High",0,0.7,1,"Score_1"
Respondent_37,"Cow","Lameness","Low","High",0.05,0.7,1,"Score_1"
Respondent_37,"Cow","Lameness","Low","Moderate",0.05,0.4,1,"Score_1"
Respondent_37,"Cow","Lameness","Zero","Moderate",0,0.4,1,"Score_1"
Respondent_38,"Cow","Lameness","Moderate","Moderate",0.15,0.4,0,"Score_0"
Respondent_38,"Cow","Lameness","Zero","High",0,0.7,1,"Score_1"
Respondent_38,"Cow","Lameness","Zero","Low",0,0.1,5,"Score_5"
Respondent_38,"Cow","Lameness","Low","High",0.05,0.7,0,"Score_0"
Respondent_38,"Cow","Lameness","Low","Moderate",0.05,0.4,0,"Score_0"
Respondent_40,"Cow","Lameness","Moderate","High",0.15,0.7,0,"Score_0"
Respondent_40,"Cow","Lameness","Low","Moderate",0.05,0.4,0,"Score_0"
Respondent_40,"Cow","Lameness","Zero","High",0,0.7,0,"Score_0"
Respondent_40,"Cow","Lameness","Moderate","Moderate",0.15,0.4,0,"Score_0"
Respondent_40,"Cow","Lameness","Zero","Moderate",0,0.4,1,"Score_1"
Respondent_41,"Cow","Lameness","Zero","Low",0,0.1,3,"Score_3"
Respondent_41,"Cow","Lameness","Moderate","Moderate",0.15,0.4,0,"Score_0"
Respondent_41,"Cow","Lameness","Zero","High",0,0.7,0,"Score_0"
Respondent_41,"Cow","Lameness","Low","High",0.05,0.7,0,"Score_0"
Respondent_41,"Cow","Lameness","Low","Moderate",0.05,0.4,0,"Score_0"
Respondent_42,"Cow","Lameness","Low","Low",0.05,0.1,1,"Score_1"
Respondent_42,"Cow","Lameness","Moderate","High",0.15,0.7,0,"Score_0"
Respondent_42,"Cow","Lameness","Low","Moderate",0.05,0.4,0,"Score_0"
Respondent_42,"Cow","Lameness","Moderate","Moderate",0.15,0.4,0,"Score_0"
Respondent_42,"Cow","Lameness","Zero","Moderate",0,0.4,0,"Score_0"
Respondent_43,"Cow","Lameness","Moderate","High",0.15,0.7,0,"Score_0"
Respondent_43,"Cow","Lameness","Moderate","Moderate",0.15,0.4,0,"Score_0"
Respondent_43,"Cow","Lameness","Zero","Moderate",0,0.4,3,"Score_3"
Respondent_43,"Cow","Lameness","Moderate","Low",0.15,0.1,1,"Score_1"
Respondent_43,"Cow","Lameness","Low","Moderate",0.05,0.4,2,"Score_2"
Respondent_44,"Cow","Lameness","Moderate","Moderate",0.15,0.4,0,"Score_0"
Respondent_44,"Cow","Lameness","Moderate","High",0.15,0.7,0,"Score_0"
Respondent_44,"Cow","Lameness","Zero","High",0,0.7,0,"Score_0"
Respondent_44,"Cow","Lameness","Low","Moderate",0.05,0.4,2,"Score_2"
Respondent_44,"Cow","Lameness","Zero","Moderate",0,0.4,2,"Score_2"
Respondent_45,"Cow","Lameness","Moderate","High",0.15,0.7,2,"Score_2"
Respondent_45,"Cow","Lameness","Moderate","Low",0.15,0.1,2,"Score_2"
Respondent_45,"Cow","Lameness","Zero","Low",0,0.1,4,"Score_4"
Respondent_45,"Cow","Lameness","Zero","Moderate",0,0.4,3,"Score_3"
Respondent_45,"Cow","Lameness","Low","Low",0.05,0.1,3,"Score_3"
Respondent_46,"Cow","Lameness","Low","High",0.05,0.7,1,"Score_1"
Respondent_46,"Cow","Lameness","Low","Low",0.05,0.1,3,"Score_3"
Respondent_46,"Cow","Lameness","Moderate","High",0.15,0.7,0,"Score_0"
Respondent_46,"Cow","Lameness","Moderate","Low",0.15,0.1,0,"Score_0"
Respondent_46,"Cow","Lameness","Zero","Low",0,0.1,5,"Score_5"
Respondent_47,"Cow","Lameness","Low","High",0.05,0.7,0,"Score_0"
Respondent_47,"Cow","Lameness","Zero","High",0,0.7,0,"Score_0"
Respondent_47,"Cow","Lameness","Low","Moderate",0.05,0.4,0,"Score_0"
Respondent_47,"Cow","Lameness","Moderate","Moderate",0.15,0.4,0,"Score_0"
Respondent_47,"Cow","Lameness","Zero","Low",0,0.1,2,"Score_2"
Respondent_48,"Cow","Lameness","Moderate","High",0.15,0.7,0,"Score_0"
Respondent_48,"Cow","Lameness","Zero","Low",0,0.1,3,"Score_3"
Respondent_48,"Cow","Lameness","Moderate","Low",0.15,0.1,0,"Score_0"
Respondent_48,"Cow","Lameness","Low","Low",0.05,0.1,1,"Score_1"
Respondent_48,"Cow","Lameness","Zero","Moderate",0,0.4,2,"Score_2"
Respondent_49,"Cow","Lameness","Zero","High",0,0.7,1,"Score_1"
Respondent_49,"Cow","Lameness","Moderate","Moderate",0.15,0.4,0,"Score_0"
Respondent_49,"Cow","Lameness","Low","High",0.05,0.7,1,"Score_1"
Respondent_49,"Cow","Lameness","Zero","Moderate",0,0.4,3,"Score_3"
Respondent_49,"Cow","Lameness","Low","Moderate",0.05,0.4,2,"Score_2"
Respondent_5,"Cow","Lameness","Moderate","Moderate",0.15,0.4,0,"Score_0"
Respondent_5,"Cow","Lameness","Zero","Low",0,0.1,2,"Score_2"
Respondent_5,"Cow","Lameness","Low","Low",0.05,0.1,1,"Score_1"
Respondent_5,"Cow","Lameness","Moderate","High",0.15,0.7,0,"Score_0"
Respondent_5,"Cow","Lameness","Zero","Moderate",0,0.4,0,"Score_0"
Respondent_50,"Cow","Lameness","Low","Moderate",0.05,0.4,2,"Score_2"
Respondent_50,"Cow","Lameness","Zero","High",0,0.7,3,"Score_3"
Respondent_50,"Cow","Lameness","Moderate","Moderate",0.15,0.4,1,"Score_1"
Respondent_50,"Cow","Lameness","Low","High",0.05,0.7,2,"Score_2"
Respondent_50,"Cow","Lameness","Zero","Low",0,0.1,7,"Score_7"
Respondent_51,"Cow","Lameness","Low","High",0.05,0.7,0,"Score_0"
Respondent_51,"Cow","Lameness","Low","Moderate",0.05,0.4,1,"Score_1"
Respondent_51,"Cow","Lameness","Moderate","Moderate",0.15,0.4,0,"Score_0"
Respondent_51,"Cow","Lameness","Zero","High",0,0.7,1,"Score_1"
Respondent_51,"Cow","Lameness","Zero","Moderate",0,0.4,2,"Score_2"
Respondent_52,"Cow","Lameness","Moderate","High",0.15,0.7,1,"Score_1"
Respondent_52,"Cow","Lameness","Moderate","Moderate",0.15,0.4,2,"Score_2"
Respondent_52,"Cow","Lameness","Low","Moderate",0.05,0.4,3,"Score_3"
Respondent_52,"Cow","Lameness","Zero","High",0,0.7,1,"Score_1"
Respondent_52,"Cow","Lameness","Zero","Moderate",0,0.4,3,"Score_3"
Respondent_53,"Cow","Lameness","Low","Low",0.05,0.1,1,"Score_1"
Respondent_53,"Cow","Lameness","Moderate","Low",0.15,0.1,0,"Score_0"
Respondent_53,"Cow","Lameness","Zero","Moderate",0,0.4,0,"Score_0"
Respondent_53,"Cow","Lameness","Moderate","High",0.15,0.7,0,"Score_0"
Respondent_53,"Cow","Lameness","Low","High",0.05,0.7,1,"Score_1"
Respondent_54,"Cow","Lameness","Moderate","Low",0.15,0.1,1,"Score_1"
Respondent_54,"Cow","Lameness","Low","High",0.05,0.7,1,"Score_1"
Respondent_54,"Cow","Lameness","Zero","High",0,0.7,2,"Score_2"
Respondent_54,"Cow","Lameness","Moderate","Moderate",0.15,0.4,1,"Score_1"
Respondent_54,"Cow","Lameness","Zero","Low",0,0.1,4,"Score_4"
Respondent_55,"Cow","Lameness","Moderate","Moderate",0.15,0.4,0,"Score_0"
Respondent_55,"Cow","Lameness","Zero","Moderate",0,0.4,0,"Score_0"
Respondent_55,"Cow","Lameness","Moderate","High",0.15,0.7,0,"Score_0"
Respondent_55,"Cow","Lameness","Low","Moderate",0.05,0.4,3,"Score_3"
Respondent_55,"Cow","Lameness","Low","Low",0.05,0.1,3,"Score_3"
Respondent_56,"Cow","Lameness","Low","High",0.05,0.7,1,"Score_1"
Respondent_56,"Cow","Lameness","Zero","Low",0,0.1,3,"Score_3"
Respondent_56,"Cow","Lameness","Zero","High",0,0.7,0,"Score_0"
Respondent_56,"Cow","Lameness","Moderate","Low",0.15,0.1,1,"Score_1"
Respondent_56,"Cow","Lameness","Low","Low",0.05,0.1,2,"Score_2"
Respondent_57,"Cow","Lameness","Zero","Moderate",0,0.4,3,"Score_3"
Respondent_57,"Cow","Lameness","Moderate","Low",0.15,0.1,1,"Score_1"
Respondent_57,"Cow","Lameness","Moderate","Moderate",0.15,0.4,0,"Score_0"
Respondent_57,"Cow","Lameness","Moderate","High",0.15,0.7,0,"Score_0"
Respondent_57,"Cow","Lameness","Low","Low",0.05,0.1,3,"Score_3"
Respondent_58,"Cow","Lameness","Low","Moderate",0.05,0.4,1,"Score_1"
Respondent_58,"Cow","Lameness","Zero","High",0,0.7,0,"Score_0"
Respondent_58,"Cow","Lameness","Moderate","High",0.15,0.7,0,"Score_0"
Respondent_58,"Cow","Lameness","Zero","Moderate",0,0.4,1,"Score_1"
Respondent_58,"Cow","Lameness","Moderate","Moderate",0.15,0.4,0,"Score_0"
Respondent_59,"Cow","Lameness","Low","Low",0.05,0.1,3,"Score_3"
Respondent_59,"Cow","Lameness","Zero","Low",0,0.1,5,"Score_5"
Respondent_59,"Cow","Lameness","Zero","High",0,0.7,3,"Score_3"
Respondent_59,"Cow","Lameness","Moderate","Low",0.15,0.1,2,"Score_2"
Respondent_59,"Cow","Lameness","Low","High",0.05,0.7,2,"Score_2"
Respondent_6,"Cow","Lameness","Low","High",0.05,0.7,0,"Score_0"
Respondent_6,"Cow","Lameness","Zero","High",0,0.7,1,"Score_1"
Respondent_6,"Cow","Lameness","Moderate","Moderate",0.15,0.4,0,"Score_0"
Respondent_6,"Cow","Lameness","Low","Moderate",0.05,0.4,0,"Score_0"
Respondent_6,"Cow","Lameness","Zero","Moderate",0,0.4,3,"Score_3"
Respondent_61,"Cow","Lameness","Moderate","Low",0.15,0.1,0,"Score_0"
Respondent_61,"Cow","Lameness","Low","Moderate",0.05,0.4,0,"Score_0"
Respondent_61,"Cow","Lameness","Zero","Moderate",0,0.4,0,"Score_0"
Respondent_61,"Cow","Lameness","Low","Low",0.05,0.1,1,"Score_1"
Respondent_61,"Cow","Lameness","Moderate","High",0.15,0.7,0,"Score_0"
Respondent_62,"Cow","Lameness","Zero","High",0,0.7,0,"Score_0"
Respondent_62,"Cow","Lameness","Moderate","Low",0.15,0.1,0,"Score_0"
Respondent_62,"Cow","Lameness","Moderate","High",0.15,0.7,0,"Score_0"
Respondent_62,"Cow","Lameness","Low","Low",0.05,0.1,1,"Score_1"
Respondent_62,"Cow","Lameness","Zero","Low",0,0.1,6,"Score_6"
Respondent_63,"Cow","Lameness","Zero","Low",0,0.1,5,"Score_5"
Respondent_63,"Cow","Lameness","Zero","High",0,0.7,0,"Score_0"
Respondent_63,"Cow","Lameness","Moderate","Moderate",0.15,0.4,0,"Score_0"
Respondent_63,"Cow","Lameness","Low","High",0.05,0.7,2,"Score_2"
Respondent_63,"Cow","Lameness","Low","Moderate",0.05,0.4,2,"Score_2"
Respondent_64,"Cow","Lameness","Moderate","Low",0.15,0.1,1,"Score_1"
Respondent_64,"Cow","Lameness","Moderate","High",0.15,0.7,0,"Score_0"
Respondent_64,"Cow","Lameness","Low","Low",0.05,0.1,2,"Score_2"
Respondent_64,"Cow","Lameness","Moderate","Moderate",0.15,0.4,0,"Score_0"
Respondent_64,"Cow","Lameness","Zero","Moderate",0,0.4,0,"Score_0"
Respondent_67,"Cow","Lameness","Moderate","Low",0.15,0.1,1,"Score_1"
Respondent_67,"Cow","Lameness","Moderate","High",0.15,0.7,0,"Score_0"
Respondent_67,"Cow","Lameness","Low","Low",0.05,0.1,1,"Score_1"
Respondent_67,"Cow","Lameness","Low","High",0.05,0.7,0,"Score_0"
Respondent_67,"Cow","Lameness","Zero","High",0,0.7,0,"Score_0"
Respondent_68,"Cow","Lameness","Moderate","Low",0.15,0.1,1,"Score_1"
Respondent_68,"Cow","Lameness","Low","High",0.05,0.7,1,"Score_1"
Respondent_68,"Cow","Lameness","Low","Low",0.05,0.1,4,"Score_4"
Respondent_68,"Cow","Lameness","Zero","High",0,0.7,2,"Score_2"
Respondent_68,"Cow","Lameness","Zero","Low",0,0.1,7,"Score_7"
Respondent_69,"Cow","Lameness","Low","High",0.05,0.7,3,"Score_3"
Respondent_69,"Cow","Lameness","Moderate","Moderate",0.15,0.4,1,"Score_1"
Respondent_69,"Cow","Lameness","Low","Moderate",0.05,0.4,4,"Score_4"
Respondent_69,"Cow","Lameness","Zero","High",0,0.7,4,"Score_4"
Respondent_69,"Cow","Lameness","Zero","Moderate",0,0.4,6,"Score_6"
Respondent_7,"Cow","Lameness","Zero","Moderate",0,0.4,4,"Score_4"
Respondent_7,"Cow","Lameness","Low","Low",0.05,0.1,1,"Score_1"
Respondent_7,"Cow","Lameness","Moderate","Moderate",0.15,0.4,0,"Score_0"
Respondent_7,"Cow","Lameness","Moderate","High",0.15,0.7,0,"Score_0"
Respondent_7,"Cow","Lameness","Low","Moderate",0.05,0.4,1,"Score_1"
Respondent_70,"Cow","Lameness","Zero","Low",0,0.1,4,"Score_4"
Respondent_70,"Cow","Lameness","Zero","High",0,0.7,2,"Score_2"
Respondent_70,"Cow","Lameness","Low","High",0.05,0.7,0,"Score_0"
Respondent_70,"Cow","Lameness","Moderate","Low",0.15,0.1,0,"Score_0"
Respondent_70,"Cow","Lameness","Low","Moderate",0.05,0.4,2,"Score_2"
Respondent_71,"Cow","Lameness","Moderate","Low",0.15,0.1,0,"Score_0"
Respondent_71,"Cow","Lameness","Moderate","High",0.15,0.7,0,"Score_0"
Respondent_71,"Cow","Lameness","Low","Low",0.05,0.1,1,"Score_1"
Respondent_71,"Cow","Lameness","Zero","Moderate",0,0.4,2,"Score_2"
Respondent_71,"Cow","Lameness","Zero","Low",0,0.1,3,"Score_3"
Respondent_74,"Cow","Lameness","Zero","Low",0,0.1,4,"Score_4"
Respondent_74,"Cow","Lameness","Low","High",0.05,0.7,0,"Score_0"
Respondent_74,"Cow","Lameness","Low","Moderate",0.05,0.4,1,"Score_1"
Respondent_74,"Cow","Lameness","Zero","High",0,0.7,0,"Score_0"
Respondent_74,"Cow","Lameness","Moderate","Moderate",0.15,0.4,0,"Score_0"
Respondent_75,"Cow","Lameness","Low","Moderate",0.05,0.4,2,"Score_2"
Respondent_75,"Cow","Lameness","Moderate","Moderate",0.15,0.4,1,"Score_1"
Respondent_75,"Cow","Lameness","Zero","Moderate",0,0.4,3,"Score_3"
Respondent_75,"Cow","Lameness","Low","Low",0.05,0.1,2,"Score_2"
Respondent_75,"Cow","Lameness","Moderate","Low",0.15,0.1,1,"Score_1"
Respondent_76,"Cow","Lameness","Low","Low",0.05,0.1,0,"Score_0"
Respondent_76,"Cow","Lameness","Moderate","High",0.15,0.7,0,"Score_0"
Respondent_76,"Cow","Lameness","Zero","Low",0,0.1,2,"Score_2"
Respondent_76,"Cow","Lameness","Zero","Moderate",0,0.4,0,"Score_0"
Respondent_76,"Cow","Lameness","Moderate","Low",0.15,0.1,0,"Score_0"
Respondent_77,"Cow","Lameness","Zero","Low",0,0.1,4,"Score_4"
Respondent_77,"Cow","Lameness","Low","Low",0.05,0.1,3,"Score_3"
Respondent_77,"Cow","Lameness","Moderate","Low",0.15,0.1,2,"Score_2"
Respondent_77,"Cow","Lameness","Zero","Moderate",0,0.4,3,"Score_3"
Respondent_77,"Cow","Lameness","Moderate","High",0.15,0.7,2,"Score_2"
Respondent_78,"Cow","Lameness","Moderate","Moderate",0.15,0.4,1,"Score_1"
Respondent_78,"Cow","Lameness","Zero","Low",0,0.1,8,"Score_8"
Respondent_78,"Cow","Lameness","Zero","High",0,0.7,6,"Score_6"
Respondent_78,"Cow","Lameness","Low","Moderate",0.05,0.4,3,"Score_3"
Respondent_78,"Cow","Lameness","Low","High",0.05,0.7,3,"Score_3"
Respondent_8,"Cow","Lameness","Zero","High",0,0.7,3,"Score_3"
Respondent_8,"Cow","Lameness","Low","Low",0.05,0.1,8,"Score_8"
Respondent_8,"Cow","Lameness","Zero","Low",0,0.1,10,"Score_10"
Respondent_8,"Cow","Lameness","Low","High",0.05,0.7,2,"Score_2"
Respondent_8,"Cow","Lameness","Moderate","Low",0.15,0.1,2,"Score_2"
Respondent_80,"Cow","Lameness","Moderate","Low",0.15,0.1,0,"Score_0"
Respondent_80,"Cow","Lameness","Low","Low",0.05,0.1,1,"Score_1"
Respondent_80,"Cow","Lameness","Moderate","High",0.15,0.7,0,"Score_0"
Respondent_80,"Cow","Lameness","Zero","Moderate",0,0.4,1,"Score_1"
Respondent_80,"Cow","Lameness","Zero","Low",0,0.1,7,"Score_7"
Respondent_81,"Cow","Lameness","Zero","Moderate",0,0.4,4,"Score_4"
Respondent_81,"Cow","Lameness","Low","High",0.05,0.7,0,"Score_0"
Respondent_81,"Cow","Lameness","Low","Low",0.05,0.1,2,"Score_2"
Respondent_81,"Cow","Lameness","Moderate","Low",0.15,0.1,0,"Score_0"
Respondent_81,"Cow","Lameness","Moderate","High",0.15,0.7,0,"Score_0"
Respondent_82,"Cow","Lameness","Zero","Moderate",0,0.4,0,"Score_0"
Respondent_82,"Cow","Lameness","Moderate","High",0.15,0.7,0,"Score_0"
Respondent_82,"Cow","Lameness","Moderate","Moderate",0.15,0.4,0,"Score_0"
Respondent_82,"Cow","Lameness","Zero","High",0,0.7,0,"Score_0"
Respondent_82,"Cow","Lameness","Low","Moderate",0.05,0.4,0,"Score_0"
Respondent_83,"Cow","Lameness","Moderate","Moderate",0.15,0.4,0,"Score_0"
Respondent_83,"Cow","Lameness","Low","Low",0.05,0.1,2,"Score_2"
Respondent_83,"Cow","Lameness","Moderate","High",0.15,0.7,0,"Score_0"
Respondent_83,"Cow","Lameness","Zero","Moderate",0,0.4,3,"Score_3"
Respondent_83,"Cow","Lameness","Moderate","Low",0.15,0.1,0,"Score_0"
Respondent_84,"Cow","Lameness","Zero","Moderate",0,0.4,1,"Score_1"
Respondent_84,"Cow","Lameness","Moderate","High",0.15,0.7,0,"Score_0"
Respondent_84,"Cow","Lameness","Moderate","Moderate",0.15,0.4,0,"Score_0"
Respondent_84,"Cow","Lameness","Low","Moderate",0.05,0.4,0,"Score_0"
Respondent_84,"Cow","Lameness","Low","Low",0.05,0.1,1,"Score_1"
Respondent_85,"Cow","Lameness","Low","Low",0.05,0.1,3,"Score_3"
Respondent_85,"Cow","Lameness","Zero","Moderate",0,0.4,6,"Score_6"
Respondent_85,"Cow","Lameness","Moderate","High",0.15,0.7,0,"Score_0"
Respondent_85,"Cow","Lameness","Zero","High",0,0.7,4,"Score_4"
Respondent_85,"Cow","Lameness","Moderate","Moderate",0.15,0.4,0,"Score_0"
Respondent_86,"Cow","Lameness","Moderate","High",0.15,0.7,0,"Score_0"
Respondent_86,"Cow","Lameness","Zero","Moderate",0,0.4,1,"Score_1"
Respondent_86,"Cow","Lameness","Zero","High",0,0.7,0,"Score_0"
Respondent_86,"Cow","Lameness","Moderate","Moderate",0.15,0.4,0,"Score_0"
Respondent_86,"Cow","Lameness","Low","Moderate",0.05,0.4,1,"Score_1"
Respondent_87,"Cow","Lameness","Zero","Low",0,0.1,5,"Score_5"
Respondent_87,"Cow","Lameness","Low","High",0.05,0.7,0,"Score_0"
Respondent_87,"Cow","Lameness","Moderate","Moderate",0.15,0.4,0,"Score_0"
Respondent_87,"Cow","Lameness","Low","Moderate",0.05,0.4,0,"Score_0"
Respondent_87,"Cow","Lameness","Zero","High",0,0.7,5,"Score_5"
Respondent_88,"Cow","Lameness","Moderate","Moderate",0.15,0.4,1,"Score_1"
Respondent_88,"Cow","Lameness","Zero","Moderate",0,0.4,2,"Score_2"
Respondent_88,"Cow","Lameness","Low","Moderate",0.05,0.4,2,"Score_2"
Respondent_88,"Cow","Lameness","Moderate","High",0.15,0.7,0,"Score_0"
Respondent_88,"Cow","Lameness","Zero","High",0,0.7,0,"Score_0"
Respondent_89,"Cow","Lameness","Moderate","Low",0.15,0.1,0,"Score_0"
Respondent_89,"Cow","Lameness","Low","Low",0.05,0.1,2,"Score_2"
Respondent_89,"Cow","Lameness","Moderate","High",0.15,0.7,0,"Score_0"
Respondent_89,"Cow","Lameness","Zero","Moderate",0,0.4,3,"Score_3"
Respondent_89,"Cow","Lameness","Low","High",0.05,0.7,1,"Score_1"
Respondent_9,"Cow","Lameness","Zero","Moderate",0,0.4,7,"Score_7"
Respondent_9,"Cow","Lameness","Moderate","High",0.15,0.7,4,"Score_4"
Respondent_9,"Cow","Lameness","Low","Moderate",0.05,0.4,6,"Score_6"
Respondent_9,"Cow","Lameness","Moderate","Moderate",0.15,0.4,4,"Score_4"
Respondent_9,"Cow","Lameness","Zero","High",0,0.7,4,"Score_4"
Respondent_90,"Cow","Lameness","Moderate","Low",0.15,0.1,1,"Score_1"
Respondent_90,"Cow","Lameness","Low","Low",0.05,0.1,3,"Score_3"
Respondent_90,"Cow","Lameness","Zero","Low",0,0.1,5,"Score_5"
Respondent_90,"Cow","Lameness","Moderate","High",0.15,0.7,0,"Score_0"
Respondent_90,"Cow","Lameness","Zero","Moderate",0,0.4,3,"Score_3"
Respondent_91,"Cow","Lameness","Moderate","Moderate",0.15,0.4,0,"Score_0"
Respondent_91,"Cow","Lameness","Zero","Low",0,0.1,10,"Score_10"
Respondent_91,"Cow","Lameness","Zero","High",0,0.7,3,"Score_3"
Respondent_91,"Cow","Lameness","Low","High",0.05,0.7,1,"Score_1"
Respondent_91,"Cow","Lameness","Low","Moderate",0.05,0.4,3,"Score_3"
Respondent_92,"Cow","Lameness","Moderate","Moderate",0.15,0.4,5,"Score_5"
Respondent_92,"Cow","Lameness","Low","Moderate",0.05,0.4,5,"Score_5"
Respondent_92,"Cow","Lameness","Zero","High",0,0.7,5,"Score_5"
Respondent_92,"Cow","Lameness","Zero","Low",0,0.1,5,"Score_5"
Respondent_92,"Cow","Lameness","Low","High",0.05,0.7,5,"Score_5"
Respondent_93,"Cow","Lameness","Moderate","Moderate",0.15,0.4,1,"Score_1"
Respondent_93,"Cow","Lameness","Zero","Low",0,0.1,4,"Score_4"
Respondent_93,"Cow","Lameness","Low","Moderate",0.05,0.4,3,"Score_3"
Respondent_93,"Cow","Lameness","Moderate","Low",0.15,0.1,2,"Score_2"
Respondent_93,"Cow","Lameness","Zero","High",0,0.7,1,"Score_1"
Respondent_94,"Cow","Lameness","Zero","Low",0,0.1,9,"Score_9"
Respondent_94,"Cow","Lameness","Zero","High",0,0.7,3,"Score_3"
Respondent_94,"Cow","Lameness","Low","High",0.05,0.7,2,"Score_2"
Respondent_94,"Cow","Lameness","Low","Moderate",0.05,0.4,2,"Score_2"
Respondent_94,"Cow","Lameness","Moderate","Low",0.15,0.1,1,"Score_1"
Respondent_95,"Cow","Lameness","Low","Moderate",0.05,0.4,3,"Score_3"
Respondent_95,"Cow","Lameness","Zero","High",0,0.7,3,"Score_3"
Respondent_95,"Cow","Lameness","Moderate","Moderate",0.15,0.4,2,"Score_2"
Respondent_95,"Cow","Lameness","Zero","Moderate",0,0.4,4,"Score_4"
Respondent_95,"Cow","Lameness","Low","High",0.05,0.7,2,"Score_2"
Respondent_96,"Cow","Lameness","Moderate","Low",0.15,0.1,0,"Score_0"
Respondent_96,"Cow","Lameness","Low","Low",0.05,0.1,1,"Score_1"
Respondent_96,"Cow","Lameness","Moderate","High",0.15,0.7,0,"Score_0"
Respondent_96,"Cow","Lameness","Zero","Low",0,0.1,5,"Score_5"
Respondent_96,"Cow","Lameness","Zero","Moderate",0,0.4,2,"Score_2"
Respondent_98,"Cow","Lameness","Zero","Moderate",0,0.4,1,"Score_1"
Respondent_98,"Cow","Lameness","Low","High",0.05,0.7,0,"Score_0"
Respondent_98,"Cow","Lameness","Moderate","Moderate",0.15,0.4,0,"Score_0"
Respondent_98,"Cow","Lameness","Zero","High",0,0.7,0,"Score_0"
Respondent_98,"Cow","Lameness","Low","Moderate",0.05,0.4,1,"Score_1"
