# Supplementary material for: Should the Contribution of One Additional Lame Cow Depend on How Many Other Cows on the Farm Are Lame?
Source: Animals (Basel). 2017 Dec 11;7(12):96. doi: 10.3390/ani7120096 (PMC5742790; doi:10.3390/ani7120096)
Supplement: Supplementary file 1 [file animals-07-00096-s001.zip › Kopi af supplementary - Copy of Farm data (N44).xlsx]

## Sheet: Farm data
	FARM LEVEL DATA (including lameness prevalences)													CRITERIA LEVEL												PINCIPLE LEVEL				OVERALL
	Animals on farm	Sample size	Animals score 0	Animals score 1	Animals score 2	% animals score 0	% animals score 1	% animals score 2	Stald 1 = Senge 2 = Dyb	Underlag 1 = Gummimåtte 2 = Madras 3 = Sand 4 = Dybstrø 5 = Halm 6 = Latex	Malk 1 = Alm 2 = Robot	Digital dermatitis 1 = Ja 2= Nej	Gulv 1 = Spalter 2 = Fast 3 = Dybstrø	C1 = Absence of prolonged hunger.	C2 = Absence of prolonged thirst.	C3 = Comfort around resting.	C4 = Thermal comfort (No measure developed).	C5 = Ease of movement.	C6 = Absence of injuries.	C7 = Absence of disease.	C8 = Absence of pain induced by management procedures.	C9 = Expression of social behaviours.	C10 = Expression of other behaviours.	C11 = Good human animal relationsship.	C12 = Positive emotional state.	P1 = Good Feeding.	P2 = Good housing.	P3 = Good Health.	P4 = Appropriate behaviour.	Overall Assessment
Farm01	330	84	51	19	14	60.7143	22.619	16.6667	1	3	1	1	2	44.5	100	19.8		100	37.2	74.3	58	83.5	0	54.6	77.2	59.5	49.5	46.1	33.1	2		Not classified	Acceptable	Enhanced	Excellent
Farm02	185	73	17	42	14	23.2877	57.5342	19.1781	1	2	2	1	2	52.3	100	16.4		100	15.5	44.8	58	39.7	0	51	64.9	65.2	47.3	24.2	26.1	2
Farm03	150	64	27	24	13	42.1875	37.5	20.3125	2	4	2	1	3	40.3	100	53.8		100	16	56.6	58	83.7	0	39	75.6	56.4	70.9	25.9	27.7	3
Farm04	120	58	39	13	6	67.2414	22.4138	10.3448	1	1	2	2	1	35.2	100	16.4		100	23.5	44.8	58	67	0	36.4	70	52.7	47.3	30.3	25	2
Farm05	245	80	44	21	15	55	26.25	18.75	1	5	2	1	2	34.3	100	26.7		100	29.4	44.8	58	46.4	0	27.3	29.1	52	53.9	34.8	16.2	3
Farm06	179	78	33	27	18	42.3077	34.6154	23.0769	1	2	1	1	2	35.4	100	45.1		100	20.3	74.3	58	91.4	0	22.3	63.2	52.8	65.4	33.3	21.8	3
Farm07	110	30	15	12	3	50	40	10	2	4	1	1	3	76.2	100	53.8		100	57.5	64.6	58	77.7	71.4	52.5	74.8	82.6	70.9	59.2	62.7	3
Farm08	138	68	19	38	11	27.9412	55.8824	16.1765	1	2	1	1	1	34.3	60	45.1		100	31.7	44.8	58	51.7	0	35.1	0	41.3	65.4	36.5	5.9	2
Farm09	265	79	27	47	5	34.1772	59.4937	6.32911	1	3	1	1	2	81	100	45.1		100	32.7	64.6	58	77.4	0	45.8	80.4	86.1	65.4	40.4	30	3
Farm10	147	69	53	14	2	76.8116	20.2899	2.89855	1	2	1	2	2	62.4	100	26.7		100	44.5	86	58	41.8	72.6	40.1	56.6	72.6	53.9	54.5	44.9	3
Farm11	124	61	54	6	1	88.5246	9.83607	1.63934	1	3	1	2	1	100	100	42.5		100	70.7	56.6	58	36.9	72.6	56.8	81.8	100	63.8	58.4	51	3
Farm12	172	72	34	35	3	47.2222	48.6111	4.16667	1	1	1	1	2	51.9	100	16.4		100	33.9	40.4	58	90.3	60.8	36.3	36	64.9	47.3	37.8	42	2
Farm13	135	67	13	50	4	19.403	74.6269	5.97015	1	2	2	1	1	45.2	100	45.1		100	22.6	64.6	58	87	0	62.5	72.4	60	65.4	32.7	35.7	3
Farm14	117	19	10	9	0	52.6316	47.3684	0	2	4	1	1	3	86.1	3	35.1		100	62	40.4	58	97.2	72.6	29.6	2.6	13	59.1	45.1	21.5	2
Farm15	137	63	49	13	1	77.7778	20.6349	1.5873	1	3	2	2	2	67.7	100	16.4		100	60.9	44.8	58	100	72.6	49	69.5	76.4	47.3	48.3	62.2	3
Farm16	124	59	50	9	0	84.7458	15.2542	0	1	2	1	2	1	100	60	26.7		100	56.2	64.6	58	83.8	53.6	29.3	23.5	64.8	53.9	58.2	31.9	3
Farm17	277	78	39	26	7	50	33.3333	8.97436	1	3	1	1	2	65.7	60	26.7		100	39.8	56.6	58	66.8	0	39.5	37.3	60.7	53.9	44	22.4	3
Farm18	191	74	15	56	3	20.2703	75.6757	4.05405	1	6	2	1	1	100	3	16.4		100	30.3	40.4	58	78.1	0	60.4	68.7	14.6	47.3	35	33.8	2
Farm19	209	75	0	66	9	0	88	12	1	1	2	1	1	33	3	16.4		100	12.3	56.6	58	82.8	0	75.1	7.8	6.6	47.3	23.1	12.9	1
Farm20	173	70	50	19	1	71.4286	27.1429	1.42857	1	3	1	1	1	100	3	35.1		100	53.6	74.3	58	70.3	0	36.9	69.8	14.6	59.1	58.6	25.2	2
Farm21	154	66	21	42	3	31.8182	63.6364	4.54545	1	1	2	1	2	41.1	3	35.1		100	22.4	44.8	58	79.3	0	76.2	77.6	7.6	59.1	29.5	40.1	2
Farm22	452	87	37	47	3	42.5287	54.023	3.44828	1	2	1	1	1	68.5	100	37.1		100	28.3	44.8	58	91.5	0	36.7	69.5	77	60.4	34	27.2	3
Farm23	179	72	26	37	9	36.1111	51.3889	12.5	1	2	2	1	1	57.3	100	16.4		100	21.5	40.4	58	73.2	0	45.4	16.1	68.8	47.3	28.3	14.7	2
Farm24	183	71	12	37	16	16.9014	52.1127	22.5352	1	3	2	1	1	37.4	60	26.7		100	22.9	36.7	58	92.2	0	51	0	43.5	53.9	29	10.2	2
Farm25	132	68	24	39	5	35.2941	57.3529	7.35294	1	1	2	1	2	34.3	100	16.4		100	23.2	44.8	58	74.4	0	35.6	60.3	52.1	47.3	30.1	24.4	2
Farm26	143	65	53	9	0	81.5385	13.8462	0	1	6	1	1	2	100	3	26.7		100	61.1	56.6	58	87.8	72.6	53.6	59.3	14.6	53.9	57.3	59.5	2
Farm27	141	64	21	43	0	32.8125	67.1875	0	1	2	1	1	1	68	60	16.4		100	26.4	40.4	58	84.2	0	64.9	70.4	61	47.3	32.1	36.1	2
Farm28	164	69	22	44	3	31.8841	63.7681	4.34783	1	2	1	1	2	30.1	60	26.7		100	22.5	36.7	58	76.2	0	68.8	66.9	38.2	53.9	28.7	35.8	2
Farm29	120	65	29	32	4	44.6154	49.2308	6.15385	1	3	1	1	2	60.8	100	16.4		100	32.6	50.1	58	73.3	64.1	52.5	70.1	71.4	47.3	37.8	59.6	3
Farm30	125	60	27	32	1	45	53.3333	1.66667	1	2	1	1	2	87	100	26.7		100	35.3	40.4	58	74.8	72.6	43.7	47	90.5	53.9	38.8	48.6	3
Farm31	114	58	26	32	0	44.8276	55.1724	0	1	1	1	1	1	100	3	26.7		100	35.2	86	58	85.4	0	61.3	85.7	14.6	53.9	47.4	36.3	2
Farm32	416	91	18	69	4	19.7802	75.8242	4.3956	1	2	2	1	1	50.3	60	26.7		100	21.4	56.6	58	82	0	56.5	51.2	52.9	53.9	30	29.8	3
Farm33	298	84	20	61	3	23.8095	72.619	3.57143	1	2	2	1	2	67.7	60	16.4		100	19.4	44.8	58	87.2	0	44.2	70.7	60.9	47.3	27.2	29.4	2
Farm34	265	82	53	28	1	64.6341	34.1463	1.21951	1	2	2	1	1	81.6	100	16.4		100	34.9	44.8	58	79	0	57	74.7	86.6	47.3	39	33.3	2
Farm35	189	64	36	28	0	56.25	43.75	0	1	2	1	1	1	68	100	35.1		100	26.8	44.8	58	80.3	0	43	48.6	76.7	59.1	32.8	26.5	3
Farm36	168	72	43	29	0	59.7222	40.2778	0	1	1	1	1	1	70.9	60	35.1		100	34.4	44.8	58	79.8	0	59.5	71.9	61.3	59.1	38.6	34	3
Farm37	264	72	14	55	3	19.4444	76.3889	4.16667	1	1	2	1	1	33.7	100	18.5		100	16.1	44.8	58	68.1	0	32.9	7.2	51.6	48.6	24.7	10.3	2
Farm38	201	77	25	48	4	32.4675	62.3377	5.19481	1	1	1	1	1	37	100	26.7		100	22.6	50.1	58	66	64.1	47.7	22.7	54	53.9	30.3	35.4	3
Farm39	102	55	23	28	4	41.8182	50.9091	7.27273	1	1	1	1	1	64.1	60	26.7		100	25.7	74.3	58	67.9	0	40.5	67.3	60.5	53.9	37.3	25.9	3
Farm40	163	71	36	35	0	50.7042	49.2958	0	1	1	1	1	1	88.9	60	26.7		100	31.3	56.6	58	94.3	0	78.7	88.8	63.5	53.9	37.5	43.3	3
Farm41	192	68	20	46	2	29.4118	67.6471	2.94118	1	2	1	1	1	50.2	3	16.4		100	23.5	44.8	58	75.1	72.6	51.1	30.2	8.7	47.3	30.4	41.8	2
Farm42	171	72	19	44	1	26.3889	61.1111	1.38889	1	2	2	1	1	79.4	3	16.4		100	23	74.3	58	78.4	0	65.2	75	12.2	47.3	35.3	36	2
Farm43	101	51	24	27	0	47.0588	52.9412	0	1	1	1	1	2	72.3	60	16.4		100	29	50.1	58	82.5	64.1	40.9	77.5	61.5	47.3	35.1	55.1	3
Farm44	141	21	15	6	0	71.4286	28.5714	0	2	4	1	2	3	57.5	60	53.8		100	65	74.3	58	89	64.1	75.7	71	58.1	70.9	63.2	69.6	3
